# Supplementary material for: Identification of potential biomarkers and pivotal biological pathways for prostate cancer using bioinformatics analysis methods
Source: PeerJ. 2019 Oct 4;7:e7872. doi: 10.7717/peerj.7872 (PMC6779116; doi:10.7717/peerj.7872)
Supplement: Supplemental Information 1 [file peerj-07-7872-s001.xlsx]

## Sheet: limmaTab_label
genesymbol	logFC	-lg(adj.P.Val)	adj.P.Val	x		logFC	adj.P.Val		genesymbol	logFC	-lg(adj.P.Val)	adj.P.Val	label		logFC	adj.P.Val		genesymbol	logFC	-lg(adj.P.Val)	adj.P.Val	label		x		genesymbol	logFC	#NAME?	adj.P.Val	x		FOXA1	1.92201	8.29585
CDR1	-1.45266	14.9666	1.08e-15	0		> 1	<0.05		HOXB13	1.67351	11.8794	1.32e-12	0		< -1	<0.05		CDR1	-1.45266	14.9666	1.08e-15	0		1		OSR1	-2.02891	14.5229	3e-15	1		KLK3	2.01931	8.25571
PLAC9	-0.837447	14.9666	1.08e-15	0					HOMER2	2.13681	11.4486	3.56e-12	0					COL5A3	-1.26035	14.9666	1.08e-15	0				NKX3-1	2.52869	11.4461	3.58e-12	1		KLK2	1.9547	7.91721
COL5A3	-1.26035	14.9666	1.08e-15	0					NKX3-1	2.52869	11.4461	3.58e-12	1					OSR1	-2.02891	14.5229	3e-15	1				CFD	-1.71043	8.84771	1.42e-09	1		CDH1	1.21817	6.42136
OSR1	-2.02891	14.5229	3e-15	1					YIPF1	1.31955	11.2211	6.01e-12	0					GSTM5	-1.12839	11.4461	3.58e-12	0				ACPP	2.4748	8.64016	2.29e-09	1		EPCAM	1.07663	2.25819
LGI4	-0.664661	12.3716	4.25e-13	0					SYT7	1.47371	10.3279	4.7e-11	0					KRT4	-1.48536	10.6676	2.15e-11	0				TARP	3.20686	8.31426	4.85e-09	1
SLIT3	-0.868775	11.8794	1.32e-12	0					RBM47	1.30076	10.3279	4.7e-11	0					GLIS1	-1.18114	10.3279	4.7e-11	0				FOXA1	1.92201	8.29585	5.06e-09	1
HOXB13	1.67351	11.8794	1.32e-12	0					ANXA3	1.87388	10.2211	6.01e-11	0					CNTFR	-1.07571	10.1261	7.48e-11	0				KLK3	2.01931	8.25571	5.55e-09	1
HOMER2	2.13681	11.4486	3.56e-12	0					GOLM1	1.44689	9.85387	1.4e-10	0					ADAM33	-1.19815	9.284	5.2e-10	0				FOLR1	-3.00586	8.05404	8.83e-09	1
GSTM5	-1.12839	11.4461	3.58e-12	0					PRSS8	1.85979	9.62525	2.37e-10	0					TMEM47	-1.17657	9.24185	5.73e-10	0				KLK2	1.9547	7.91721	1.21e-08	1
EMILIN3	-0.980756	11.4461	3.58e-12	0					SLC44A4	1.50274	9.35556	4.41e-10	0					SNAI2	-1.04651	9.22185	6e-10	0				ABCC4	2.26178	7.83565	1.46e-08	1
NKX3-1	2.52869	11.4461	3.58e-12	1					LRIG1	1.04161	9.284	5.2e-10	0					LOC728061	-1.1168	9.20273	6.27e-10	0				KRT13	-2.95832	7.6925	2.03e-08	1
YIPF1	1.31955	11.2211	6.01e-12	0					KLK4	1.28703	9.07676	8.38e-10	0					PRKCDBP	-1.01528	9.17522	6.68e-10	0				SLC45A3	2.46284	7.57512	2.66e-08	1
KRT4	-1.48536	10.6676	2.15e-11	0					ACPP	2.4748	8.64016	2.29e-09	1					HIF3A	-1.16311	9.07988	8.32e-10	0				CDH1	1.21817	6.42136	3.79e-07	1
NTRK3	-0.4787	10.6383	2.3e-11	0					KRT18	1.28791	8.49485	3.2e-09	0					MUSTN1	-1.54987	9.06349	8.64e-10	0				HSPB6	-1.79195	5.92445	1.19e-06	1
SYT7	1.47371	10.3279	4.7e-11	0					DHCR24	1.92015	8.32422	4.74e-09	0					CFD	-1.71043	8.84771	1.42e-09	1				MSMB	2.51798	5.29158	5.11e-06	1
RBM47	1.30076	10.3279	4.7e-11	0					TARP	3.20686	8.31426	4.85e-09	1					GATA3	-1.10304	8.59346	2.55e-09	0				SCGB1A1	-2.32465	4.61979	2.4e-05	1
GLIS1	-1.18114	10.3279	4.7e-11	0					FOXA1	1.92201	8.29585	5.06e-09	1					CFH	-1.00167	8.57349	2.67e-09	0				SLPI	-2.39118	4.40012	3.98e-05	1
ANXA3	1.87388	10.2211	6.01e-11	0					KLK3	2.01931	8.25571	5.55e-09	1					PRIMA1	-1.09529	8.45346	3.52e-09	0				OR51E2	2.82845	4.13787	7.28e-05	1
SCARA5	-0.723768	10.2034	6.26e-11	0					CREB3L4	1.08788	8.08619	8.2e-09	0					LOC441461	-1.01113	8.37059	4.26e-09	0				OLFM4	-2.41094	3.30615	0.000494142	1
CNTFR	-1.07571	10.1261	7.48e-11	0					RAB3B	2.05745	8.08145	8.29e-09	0					FOLR1	-3.00586	8.05404	8.83e-09	1				LOC100287445	2.17003	3.26384	0.000544702	1
SUSD2	-0.979604	10.1244	7.51e-11	0					TSPAN8	1.81724	7.97881	1.05e-08	0					SCGB3A1	-1.35452	7.83565	1.46e-08	0				NPY	3.36271	3.10283	0.000789175	1
GOLM1	1.44689	9.85387	1.4e-10	0					DHTKD1	1.09345	7.96257	1.09e-08	0					LCN12	-1.19205	7.82681	1.49e-08	0				SEMG1	-2.8811	2.78698	0.00163312	1
ZBTB47	-0.507879	9.79317	1.61e-10	0					KLK2	1.9547	7.91721	1.21e-08	1					KRT13	-2.95832	7.6925	2.03e-08	1				SEMG2	-2.44426	2.60839	0.00246384	1
PRSS8	1.85979	9.62525	2.37e-10	0					TSPAN1	1.77376	7.83565	1.46e-08	0					PMP22	-1.24668	7.69037	2.04e-08	0				C15orf21	2.32785	2.44184	0.00361542	1
ERN2	-0.605119	9.41341	3.86e-10	0					ABCC4	2.26178	7.83565	1.46e-08	1					C8orf84	-1.07853	7.31158	4.88e-08	0				EPCAM	1.07663	2.25819	0.00551835	1
SLC44A4	1.50274	9.35556	4.41e-10	0					PDLIM5	1.49828	7.81816	1.52e-08	0					ID4	-1.05804	7.2652	5.43e-08	0
ERBB3	0.873324	9.34008	4.57e-10	0					SPCS1	1.06828	7.69037	2.04e-08	0					CYP4B1	-1.22845	7.26122	5.48e-08	0
NT5E	-0.498314	9.29328	5.09e-10	0					DPP4	2.14994	7.68194	2.08e-08	0					FOXQ1	-1.46717	7.25727	5.53e-08	0
LRIG1	1.04161	9.284	5.2e-10	0					ACLY	1.27594	7.59176	2.56e-08	0					RAPGEFL1	-1.00007	7.15927	6.93e-08	0
ADAM33	-1.19815	9.284	5.2e-10	0					SLC45A3	2.46284	7.57512	2.66e-08	1					CCDC3	-1.24323	7.15181	7.05e-08	0
TMEM47	-1.17657	9.24185	5.73e-10	0					TMPRSS2	2.01628	7.50031	3.16e-08	0					TSPAN18	-1.09267	7.07572	8.4e-08	0
SNAI2	-1.04651	9.22185	6e-10	0					MLPH	1.54615	7.47108	3.38e-08	0					H19	-1.4801	6.98297	1.04e-07	0
LOC728061	-1.1168	9.20273	6.27e-10	0					GRHL2	1.30254	7.22475	5.96e-08	0					MUC4	-1.39993	6.74232	1.81e-07	0
ROBO4	-0.528593	9.17849	6.63e-10	0					ABHD2	1.5213	7.09963	7.95e-08	0					CLU	-1.3773	6.72125	1.9e-07	0
PRKCDBP	-1.01528	9.17522	6.68e-10	0					STEAP1	1.85516	7.06399	8.63e-08	0					ATP1B1	-1.18886	6.50307	3.14e-07	0
SEMA6D	-0.506035	9.0846	8.23e-10	0					ZDHHC9	1.09496	7.05208	8.87e-08	0					TSPAN11	-1.09333	6.29843	5.03e-07	0
HIF3A	-1.16311	9.07988	8.32e-10	0					SCD	1.79099	7.00612	9.86e-08	0					TGFB1I1	-1.23897	6.22915	5.9e-07	0
KLK4	1.28703	9.07676	8.38e-10	0					NAAA	1.07756	6.98716	1.03e-07	0					DPT	-1.43273	6.14509	7.16e-07	0
MUSTN1	-1.54987	9.06349	8.64e-10	0					CUX2	2.01374	6.98297	1.04e-07	0					HSPB6	-1.79195	5.92445	1.19e-06	1
PRKG1	-0.776156	8.97881	1.05e-09	0					ARHGEF38	1.44566	6.97469	1.06e-07	0					TMEM200B	-1.51696	5.85078	1.41e-06	0
CD34	-0.686191	8.97881	1.05e-09	0					FBXO25	1.10833	6.95861	1.1e-07	0					CRYAB	-1.3391	5.68403	2.07e-06	0
COX7A1	-0.868424	8.91364	1.22e-09	0					CLDN3	1.3113	6.95078	1.12e-07	0					HBB	-1.13848	5.63827	2.3e-06	0
CFD	-1.71043	8.84771	1.42e-09	1					ERGIC1	1.2407	6.82681	1.49e-07	0					DCN	-1.02847	5.44855	3.56e-06	0
HOXD13	-0.853834	8.81248	1.54e-09	0					KIAA1324	1.86284	6.79588	1.6e-07	0					KLF5	-1.06153	5.13906	7.26e-06	0
GPM6A	-0.300209	8.81248	1.54e-09	0					PDIA5	1.32214	6.74232	1.81e-07	0					CXCL17	-1.53486	5.13077	7.4e-06	0
HOXD11	-0.893853	8.81248	1.54e-09	0					TRPM4	1.03748	6.7167	1.92e-07	0					ASS1	-1.0349	5.09691	8e-06	0
EHD2	-0.884079	8.72125	1.9e-09	0					LCP1	1.51564	6.64397	2.27e-07	0					ATP1A2	-1.08741	5.03292	9.27e-06	0
PHF1	-0.741322	8.69037	2.04e-09	0					PMEPA1	1.34064	6.62709	2.36e-07	0					PTGDS	-1.53465	4.77211	1.69e-05	0
LPCAT4	-0.485238	8.68613	2.06e-09	0					ZNF649	1.70804	6.61798	2.41e-07	0					SCGB1A1	-2.32465	4.61979	2.4e-05	1
C1QTNF1	-0.720459	8.65758	2.2e-09	0					C2orf79	1.1982	6.56543	2.72e-07	0					SLPI	-2.39118	4.40012	3.98e-05	1
ACPP	2.4748	8.64016	2.29e-09	1					GMPR	1.18225	6.55909	2.76e-07	0					CCDC80	-1.11083	4.39254	4.05e-05	0
KATNAL1	-0.477712	8.62893	2.35e-09	0					STEAP2	2.10141	6.50585	3.12e-07	0					TMEM119	-1.03899	4.34104	4.56e-05	0
GATA3	-1.10304	8.59346	2.55e-09	0					SORD	1.4444	6.50585	3.12e-07	0					TCEAL2	-1.42678	4.30539	4.95e-05	0
CFH	-1.00167	8.57349	2.67e-09	0					P4HB	1.10394	6.50446	3.13e-07	0					FBLN5	-1.12204	4.27246	5.34e-05	0
TMEM125	0.960097	8.55284	2.8e-09	0					TPD52	1.59219	6.47366	3.36e-07	0					FHL1	-1.06018	3.62461	0.000237353	0
KRT18	1.28791	8.49485	3.2e-09	0					CDH1	1.21817	6.42136	3.79e-07	1					OLFM4	-2.41094	3.30615	0.000494142	1
ASPA	-0.770443	8.45346	3.52e-09	0					PTPRN2	1.20751	6.31247	4.87e-07	0					GSTM2	-1.05195	3.18351	0.000655374	0
PRIMA1	-1.09529	8.45346	3.52e-09	0					AIM1	1.52177	6.2426	5.72e-07	0					PATE1	-1.14089	2.98483	0.00103554	0
LOC441461	-1.01113	8.37059	4.26e-09	0					BMPR1B	1.80944	6.20971	6.17e-07	0					SEMG1	-2.8811	2.78698	0.00163312	1
DHCR24	1.92015	8.32422	4.74e-09	0					PPT1	1.05101	6.17522	6.68e-07	0					C2orf40	-1.2881	2.6656	0.00215975	0
TARP	3.20686	8.31426	4.85e-09	1					MOSC1	1.04542	6.1707	6.75e-07	0					SEMG2	-2.44426	2.60839	0.00246384	1
MRC2	-0.62962	8.3019	4.99e-09	0					C1orf85	1.04592	6.09583	8.02e-07	0					GREM1	-1.22129	2.58984	0.00257137	0
COL6A1	-0.842583	8.29585	5.06e-09	0					BNIP3	1.04346	6.07883	8.34e-07	0					ACTC1	-1.38255	2.50661	0.00311449	0
FOXA1	1.92201	8.29585	5.06e-09	1					MARCKSL1	1.42283	5.93554	1.16e-06	0					LOC642587	-1.00767	2.46173	0.00345356	0
INF2	-0.447099	8.29585	5.06e-09	0					GALNT7	1.75553	5.90309	1.25e-06	0					SPINK2	-1.02729	2.16204	0.00688588	0
GSN	-0.75569	8.29585	5.06e-09	0					FUCA1	1.12529	5.86012	1.38e-06	0					PIP	-1.18027	1.70926	0.0195317	0
TALDO1	0.656646	8.29499	5.07e-09	0					SLC35F2	1.384	5.86012	1.38e-06	0
NDE1	-0.624128	8.29499	5.07e-09	0					GCNT2	1.23703	5.79048	1.62e-06	0
DHRS7	0.673707	8.29499	5.07e-09	0					PPAPDC1B	1.19775	5.76955	1.7e-06	0
MTMR11	-0.65263	8.28651	5.17e-09	0					MBOAT2	1.5399	5.69897	2e-06	0
UNC5B	-0.579173	8.2668	5.41e-09	0					DCXR	1.05397	5.67985	2.09e-06	0
DGCR14	-0.347427	8.2668	5.41e-09	0					FXYD3	1.13098	5.6517	2.23e-06	0
KLK3	2.01931	8.25571	5.55e-09	1					C11orf75	1.43162	5.6517	2.23e-06	0
BCL9L	-0.682263	8.25571	5.55e-09	0					MAP7	1.00941	5.53611	2.91e-06	0
DMKN	-0.642314	8.23732	5.79e-09	0					VIPR1	1.10801	5.52288	3e-06	0
KIAA1543	0.952231	8.2321	5.86e-09	0					BRP44	1.24392	5.50169	3.15e-06	0
LDB3	-0.668315	8.2321	5.86e-09	0					FAM96A	1.23876	5.49757	3.18e-06	0
RAPGEF3	-0.517892	8.10237	7.9e-09	0					HIST1H2AC	1.84714	5.48413	3.28e-06	0
NHS	-0.97753	8.09583	8.02e-09	0					KIAA1244	1.18404	5.4437	3.6e-06	0
C1QTNF7	-0.438102	8.08619	8.2e-09	0					FASN	1.32618	5.34294	4.54e-06	0
LAMA5	-0.531092	8.08619	8.2e-09	0					CANT1	1.15896	5.32883	4.69e-06	0
CREB3L4	1.08788	8.08619	8.2e-09	0					MSMB	2.51798	5.29158	5.11e-06	1
RAB3B	2.05745	8.08145	8.29e-09	0					TM9SF2	1.08136	5.28483	5.19e-06	0
FOLR1	-3.00586	8.05404	8.83e-09	1					ZNF615	1.62825	5.27901	5.26e-06	0
RAP1GAP	0.844613	8.01909	9.57e-09	0					TMC5	1.29347	5.26841	5.39e-06	0
NDC80	-0.444394	8.00966	9.78e-09	0					RDH11	1.4176	5.26122	5.48e-06	0
MPZ	-0.89444	8.00349	9.92e-09	0					MYO5C	1.295	5.19314	6.41e-06	0
TSPAN8	1.81724	7.97881	1.05e-08	0					C1orf116	1.36667	5.17914	6.62e-06	0
C5orf4	-0.720782	7.97881	1.05e-08	0					SLC2A12	1.43821	5.11014	7.76e-06	0
DHTKD1	1.09345	7.96257	1.09e-08	0					SLC12A2	1.20296	5.07727	8.37e-06	0
ACVRL1	-0.557611	7.95861	1.1e-08	0					C3orf25	1.20159	5.04383	9.04e-06	0
NCAM1	-0.79297	7.94692	1.13e-08	0					AMD1	1.75581	5.03433	9.24e-06	0
KLK2	1.9547	7.91721	1.21e-08	1					SLC2A10	1.03652	5.02687	9.4e-06	0
SMAD6	-0.409076	7.83863	1.45e-08	0					ADI1	1.13429	5.00087	9.98e-06	0
SCGB3A1	-1.35452	7.83565	1.46e-08	0					SMS	1.70826	4.98297	1.04e-05	0
TSPAN1	1.77376	7.83565	1.46e-08	0					SPOCK1	2.00483	4.92445	1.19e-05	0
ABCC4	2.26178	7.83565	1.46e-08	1					ABAT	1.22998	4.92445	1.19e-05	0
FGD5	-0.452299	7.83565	1.46e-08	0					SLC30A4	1.6225	4.88606	1.3e-05	0
LCN12	-1.19205	7.82681	1.49e-08	0					C9orf152	1.33187	4.85078	1.41e-05	0
TPPP3	-0.66226	7.82391	1.5e-08	0					SOAT1	1.18662	4.84771	1.42e-05	0
MAL	-0.63602	7.81816	1.52e-08	0					GLUD1	1.05905	4.83863	1.45e-05	0
PDLIM5	1.49828	7.81816	1.52e-08	0					ZG16B	1.05446	4.81816	1.52e-05	0
ATOH8	-0.55335	7.81816	1.52e-08	0					HIST2H2BE	1.70833	4.81248	1.54e-05	0
TRIM31	-0.606571	7.80688	1.56e-08	0					SEC11C	1.44	4.8041	1.57e-05	0
COQ10A	-0.411824	7.78252	1.65e-08	0					UAP1	1.43949	4.69897	2e-05	0
LPHN1	-0.495911	7.77989	1.66e-08	0					NEDD4L	1.05537	4.6216	2.39e-05	0
DIO3OS	-0.48826	7.77989	1.66e-08	0					PRAC	1.75485	4.6216	2.39e-05	0
DCHS1	-0.877228	7.73049	1.86e-08	0					ACSL1	1.5471	4.59346	2.55e-05	0
PKD1	-0.486008	7.6968	2.01e-08	0					CNTNAP2	1.49627	4.59176	2.56e-05	0
KRT13	-2.95832	7.6925	2.03e-08	1					AZGP1P1	1.03793	4.55909	2.76e-05	0
PMP22	-1.24668	7.69037	2.04e-08	0					DSC2	1.29705	4.5544	2.79e-05	0
SPCS1	1.06828	7.69037	2.04e-08	0					RHOU	1.14983	4.54363	2.86e-05	0
PCSK5	-0.475505	7.69037	2.04e-08	0					ENDOD1	1.00617	4.52143	3.01e-05	0
DPP4	2.14994	7.68194	2.08e-08	0					DSG2	1.12908	4.5157	3.05e-05	0
ANGPTL1	-0.309187	7.67572	2.11e-08	0					ZNF577	1.28239	4.49894	3.17e-05	0
ITSN1	-0.413328	7.65365	2.22e-08	0					PRDX4	1.0275	4.37366	4.23e-05	0
CLEC3B	-0.815821	7.64975	2.24e-08	0					SLC39A6	1.13589	4.36051	4.36e-05	0
AMPD2	-0.499056	7.64207	2.28e-08	0					ESRP1	1.09611	4.35067	4.46e-05	0
S1PR2	-0.581486	7.59517	2.54e-08	0					NCAPD3	2.02589	4.34679	4.5e-05	0
C20orf194	-0.49671	7.59176	2.56e-08	0					SAT1	1.05517	4.27572	5.3e-05	0
ACLY	1.27594	7.59176	2.56e-08	0					RAB27A	1.26915	4.24489	5.69e-05	0
FAM126A	-0.514651	7.58503	2.6e-08	0					ZNF217	1.05398	4.2233	5.98e-05	0
C15orf41	-0.353542	7.57512	2.66e-08	0					COLEC12	1.14092	4.21753	6.06e-05	0
SLC45A3	2.46284	7.57512	2.66e-08	1					MYBPC1	1.8207	4.19314	6.41e-05	0
GPM6B	-0.780821	7.52433	2.99e-08	0					OR51E2	2.82845	4.13787	7.28e-05	1
TMOD1	-0.530949	7.50031	3.16e-08	0					ANO7	2.01886	4.10403	7.87e-05	0
TMPRSS2	2.01628	7.50031	3.16e-08	0					SLC4A4	1.54733	3.93265	0.000116776	0
SLC9A7	0.749112	7.49894	3.17e-08	0					PPAP2A	1.42063	3.87844	0.0001323	0
TRNP1	-0.403175	7.49349	3.21e-08	0					LOC145837	1.72814	3.8172	0.000152334	0
MLPH	1.54615	7.47108	3.38e-08	0					HIST1H2BK	1.44142	3.81495	0.000153128	0
SLC10A3	-0.51039	7.45223	3.53e-08	0					ACSL3	1.18304	3.79467	0.000160446	0
TSLP	-0.447693	7.37366	4.23e-08	0					DBI	1.08679	3.76257	0.000172753	0
S100A4	-0.862742	7.35655	4.4e-08	0					PLEKHH1	1.6597	3.74798	0.000178655	0
LTBP4	-0.873145	7.3439	4.53e-08	0					CPNE4	1.42065	3.73145	0.000185589	0
FTSJ3	-0.449726	7.33442	4.63e-08	0					AZGP1	1.33345	3.72321	0.000189143	0
CIB1	0.899963	7.32514	4.73e-08	0					TSPAN13	1.54954	3.67785	0.000209965	0
L1CAM	-0.656162	7.31336	4.86e-08	0					GNG4	1.25682	3.6479	0.000224957	0
C8orf84	-1.07853	7.31158	4.88e-08	0					SERINC5	1.62852	3.62379	0.000237797	0
RBM9	-0.567596	7.29243	5.1e-08	0					NDRG3	1.01858	3.56478	0.00027241	0
TNFSF12	-0.580492	7.27327	5.33e-08	0					ALDH1A3	1.1668	3.56062	0.000275032	0
ID4	-1.05804	7.2652	5.43e-08	0					DMXL1	1.05362	3.51367	0.000306431	0
ANGPT1	-0.5648	7.26201	5.47e-08	0					RCAN3	1.27661	3.43612	0.000366336	0
CYP4B1	-1.22845	7.26122	5.48e-08	0					AFF3	1.18264	3.43487	0.000367395	0
TMEM37	-0.553907	7.25885	5.51e-08	0					ARG2	1.78161	3.43398	0.000368142	0
FOXQ1	-1.46717	7.25727	5.53e-08	0					TRPM8	1.46211	3.38896	0.000408355	0
TPPP	-0.301103	7.25727	5.53e-08	0					C2orf14	1.83407	3.36206	0.000434448	0
OLFML1	-0.864605	7.25727	5.53e-08	0					GLO1	1.26389	3.31941	0.000479281	0
GRHL2	1.30254	7.22475	5.96e-08	0					GGT1	1.04411	3.28046	0.000524256	0
NAB1	-0.448987	7.20343	6.26e-08	0					LOC100287445	2.17003	3.26384	0.000544702	1
KSR1	-0.463602	7.20343	6.26e-08	0					FOLH1	1.91436	3.25809	0.000551962	0
FGF10	-0.541979	7.20273	6.27e-08	0					FOLH1B	1.73006	3.25624	0.000554316	0
ICA1	0.52841	7.20273	6.27e-08	0					SFTPA2	1.98948	3.24328	0.000571106	0
APOBEC3C	-0.653969	7.19723	6.35e-08	0					PPP3CA	1.26541	3.20122	0.000629183	0
KCNH2	-0.610743	7.18842	6.48e-08	0					NPY	3.36271	3.10283	0.000789175	1
LOC283174	-0.548784	7.18776	6.49e-08	0					STK39	1.18625	3.07872	0.000834228	0
MRPL36	0.972849	7.15927	6.93e-08	0					FAM3B	1.48341	3.05722	0.000876548	0
RAPGEFL1	-1.00007	7.15927	6.93e-08	0					STEAP4	1.49245	3.02272	0.000949033	0
CCDC3	-1.24323	7.15181	7.05e-08	0					TRIB1	1.03322	3.00275	0.000993698	0
B3GNT1	-0.611346	7.11126	7.74e-08	0					SLC38A11	1.42106	2.99654	0.00100799	0
ENO2	-0.540505	7.10791	7.8e-08	0					FKBP5	1.08342	2.95363	0.00111267	0
INPP1	-0.531022	7.10403	7.87e-08	0					PLA2G7	1.36338	2.88386	0.00130658	0
MAMSTR	-0.770768	7.09963	7.95e-08	0					THBS4	1.10188	2.83952	0.00144705	0
EPHA2	-0.854759	7.09963	7.95e-08	0					MIR21	1.24658	2.82932	0.00148142	0
ABHD2	1.5213	7.09963	7.95e-08	0					GGTLC1	1.09366	2.73429	0.00184377	0
RAB3D	0.981172	7.08831	8.16e-08	0					SPON2	1.75133	2.723	0.00189235	0
FCGRT	-0.508798	7.08619	8.2e-08	0					C7orf63	1.3163	2.63429	0.00232117	0
ZNF490	0.620498	7.08407	8.24e-08	0					SLC26A2	1.12513	2.63216	0.00233259	0
TSPAN18	-1.09267	7.07572	8.4e-08	0					PLA2G2A	2.16323	2.5673	0.00270834	0
TH1L	0.60534	7.07572	8.4e-08	0					LMAN1L	1.42433	2.52421	0.00299085	0
PDE4C	-0.331306	7.06753	8.56e-08	0					C15orf21	2.32785	2.44184	0.00361542	1
ACP2	0.700834	7.06753	8.56e-08	0					NAMPT	1.11397	2.30562	0.00494747	0
BRI3	0.809612	7.0655	8.6e-08	0					EPCAM	1.07663	2.25819	0.00551835	1
STEAP1	1.85516	7.06399	8.63e-08	0					GPR160	1.03205	2.25759	0.00552601	0
RNF216	-0.315186	7.06098	8.69e-08	0					ALOX15B	1.44554	2.249	0.0056364	0
ZDHHC9	1.09496	7.05208	8.87e-08	0					TMEM178	1.59316	2.18231	0.00657191	0
SCD	1.79099	7.00612	9.86e-08	0					GNMT	1.06391	2.10172	0.00791194	0
CAMK1G	-0.408131	7	1e-07	0					CPB1	1.02853	2.05258	0.00885965	0
NAAA	1.07756	6.98716	1.03e-07	0					LOC100216479	1.19679	2.03423	0.00924213	0
CUX2	2.01374	6.98297	1.04e-07	0					LOC728606	1.01108	1.91635	0.0121242	0
H19	-1.4801	6.98297	1.04e-07	0					NEFH	1.58734	1.91283	0.0122229	0
AGTRAP	0.91582	6.98297	1.04e-07	0					CXCR4	1.06595	1.89937	0.0126074	0
ARHGEF38	1.44566	6.97469	1.06e-07	0					SERPINA3	1.75437	1.81872	0.0151802	0
TAB1	-0.378919	6.96257	1.09e-07	0					SERHL2	1.42153	1.75985	0.0173841	0
PDE1C	-0.306044	6.96257	1.09e-07	0					KLK11	1.33932	1.63115	0.0233805	0
SH3PXD2A	-0.504147	6.95861	1.1e-07	0					AGR2	1.02612	1.42657	0.037448	0
FBXO25	1.10833	6.95861	1.1e-07	0					LUZP2	1.06592	1.42073	0.0379548	0
CLDN3	1.3113	6.95078	1.12e-07	0
SLC7A1	0.770271	6.94692	1.13e-07	0
TCF7L1	-0.924296	6.9431	1.14e-07	0
MMRN2	-0.585425	6.9431	1.14e-07	0
LIMS2	-0.67753	6.9431	1.14e-07	0
C16orf89	-0.648485	6.93181	1.17e-07	0
ITGA9	-0.582016	6.93181	1.17e-07	0
ANKS1A	-0.461188	6.92812	1.18e-07	0
ADCYAP1R1	-0.391541	6.85387	1.4e-07	0
DPAGT1	0.685986	6.84164	1.44e-07	0
PTGFR	-0.537379	6.82974	1.48e-07	0
PLLP	-0.450452	6.82681	1.49e-07	0
SPON1	-0.573972	6.82681	1.49e-07	0
ERGIC1	1.2407	6.82681	1.49e-07	0
HIPK2	0.630284	6.82681	1.49e-07	0
TOM1L1	0.517491	6.82681	1.49e-07	0
TTLL3	-0.413729	6.82681	1.49e-07	0
MAP1A	-0.502795	6.82391	1.5e-07	0
ADCY5	-0.637346	6.82102	1.51e-07	0
NES	-0.63985	6.81531	1.53e-07	0
SNX33	-0.462247	6.80688	1.56e-07	0
KIAA1324	1.86284	6.79588	1.6e-07	0
NKD2	-0.672547	6.79317	1.61e-07	0
COPZ2	-0.610174	6.77211	1.69e-07	0
HPN	0.95416	6.767	1.71e-07	0
ADAMTSL4	-0.58198	6.767	1.71e-07	0
PDIA5	1.32214	6.74232	1.81e-07	0
MUC4	-1.39993	6.74232	1.81e-07	0
SYDE1	-0.482636	6.74232	1.81e-07	0
DMWD	-0.40929	6.74232	1.81e-07	0
NUMBL	-0.424833	6.73283	1.85e-07	0
C3orf18	-0.477075	6.72584	1.88e-07	0
C18orf55	-0.437126	6.72584	1.88e-07	0
NYNRIN	-0.731198	6.72584	1.88e-07	0
CLU	-1.3773	6.72125	1.9e-07	0
OSBPL5	-0.33629	6.71897	1.91e-07	0
TRPM4	1.03748	6.7167	1.92e-07	0
ADPGK	0.84268	6.7167	1.92e-07	0
SPATA6	-0.738553	6.7167	1.92e-07	0
RAB3IL1	-0.596428	6.7167	1.92e-07	0
ADCY3	-0.549479	6.71444	1.93e-07	0
GPX2	-0.72162	6.7122	1.94e-07	0
PRRT1	-0.423465	6.7122	1.94e-07	0
EFEMP1	-0.96012	6.7122	1.94e-07	0
FAM102A	-0.526268	6.70774	1.96e-07	0
PLCD3	-0.576487	6.69037	2.04e-07	0
IRX1	-0.383788	6.67985	2.09e-07	0
LCP1	1.51564	6.64397	2.27e-07	0
LOC645722	-0.886001	6.63639	2.31e-07	0
ZKSCAN1	0.845461	6.62709	2.36e-07	0
PMEPA1	1.34064	6.62709	2.36e-07	0
UNC45A	-0.377605	6.62709	2.36e-07	0
TMEM50A	0.80667	6.62342	2.38e-07	0
ZNF649	1.70804	6.61798	2.41e-07	0
FOXO6	-0.536707	6.60206	2.5e-07	0
LOC642776	-0.440165	6.59346	2.55e-07	0
C2orf79	1.1982	6.56543	2.72e-07	0
MAP4	-0.460365	6.56543	2.72e-07	0
GMDS	0.987144	6.56384	2.73e-07	0
IFFO1	-0.557419	6.56225	2.74e-07	0
NANS	0.525837	6.56225	2.74e-07	0
C9orf16	-0.484959	6.55909	2.76e-07	0
SNX21	-0.514664	6.55909	2.76e-07	0
LOC389458	-0.333667	6.55909	2.76e-07	0
BECN1	0.500522	6.55909	2.76e-07	0
GMPR	1.18225	6.55909	2.76e-07	0
EFEMP2	-0.778587	6.55909	2.76e-07	0
C16orf5	-0.479729	6.55909	2.76e-07	0
TMEM132C	-0.647118	6.55596	2.78e-07	0
PNKD	0.493179	6.55129	2.81e-07	0
KIAA0556	0.504534	6.54516	2.85e-07	0
ELF4	-0.600672	6.54212	2.87e-07	0
STEAP2	2.10141	6.50585	3.12e-07	0
SORD	1.4444	6.50585	3.12e-07	0
P4HB	1.10394	6.50446	3.13e-07	0
GLDN	-0.431696	6.50446	3.13e-07	0
ATP1B1	-1.18886	6.50307	3.14e-07	0
TPD52	1.59219	6.47366	3.36e-07	0
HSPG2	-0.528276	6.46725	3.41e-07	0
PAFAH1B3	0.549959	6.4389	3.64e-07	0
SMARCC1	0.665445	6.43771	3.65e-07	0
RNASEH2C	-0.63189	6.43771	3.65e-07	0
CLIP2	-0.40452	6.42251	3.78e-07	0
LYNX1	-0.504238	6.42251	3.78e-07	0
CDH1	1.21817	6.42136	3.79e-07	1
PLEKHG5	-0.570676	6.42136	3.79e-07	0
TBX2	-0.491792	6.42136	3.79e-07	0
XBP1	0.792791	6.41794	3.82e-07	0
SLITRK6	-0.578801	6.4034	3.95e-07	0
MAP6	-0.415371	6.4034	3.95e-07	0
SLC48A1	-0.39356	6.4034	3.95e-07	0
ALDH1L2	-0.363458	6.4034	3.95e-07	0
RBP1	-0.58791	6.38722	4.1e-07	0
ANKS1B	-0.294565	6.3851	4.12e-07	0
ABCC1	0.565367	6.383	4.14e-07	0
GNB2	0.640935	6.36351	4.33e-07	0
COPG	0.842491	6.35458	4.42e-07	0
DOPEY2	0.969816	6.3536	4.43e-07	0
EAF1	0.530782	6.34008	4.57e-07	0
GCAT	0.42026	6.33913	4.58e-07	0
PTPRN2	1.20751	6.31247	4.87e-07	0
CCND3	-0.494036	6.31247	4.87e-07	0
RPP25	-0.401796	6.30364	4.97e-07	0
TSPAN11	-1.09333	6.29843	5.03e-07	0
SPTBN1	-0.406059	6.26922	5.38e-07	0
INMT	-0.616797	6.26761	5.4e-07	0
NEURL1B	-0.743817	6.26122	5.48e-07	0
SHPRH	0.668646	6.25181	5.6e-07	0
MPP7	0.546936	6.2426	5.72e-07	0
AIM1	1.52177	6.2426	5.72e-07	0
GAB1	-0.354415	6.24109	5.74e-07	0
WNT2B	-0.597305	6.23508	5.82e-07	0
CLIP3	-0.837214	6.23062	5.88e-07	0
GIT1	-0.470112	6.23062	5.88e-07	0
TGFB1I1	-1.23897	6.22915	5.9e-07	0
FAM92A1	-0.423083	6.21968	6.03e-07	0
ITIH5	-0.512373	6.2161	6.08e-07	0
BMPR1B	1.80944	6.20971	6.17e-07	0
NOTCH1	-0.386021	6.1986	6.33e-07	0
BDKRB2	-0.561054	6.19586	6.37e-07	0
EPB41L1	-0.386153	6.19246	6.42e-07	0
TRIP6	-0.544162	6.19111	6.44e-07	0
SLC35E1	0.442311	6.18243	6.57e-07	0
CRABP2	-0.57856	6.18177	6.58e-07	0
ARFIP2	0.899759	6.18046	6.6e-07	0
PPT1	1.05101	6.17522	6.68e-07	0
MOSC1	1.04542	6.1707	6.75e-07	0
SF4	-0.45536	6.16813	6.79e-07	0
PHLDA3	-0.568919	6.1549	7e-07	0
TLE4	-0.458553	6.1512	7.06e-07	0
C14orf153	-0.337924	6.1512	7.06e-07	0
DPT	-1.43273	6.14509	7.16e-07	0
CCDC46	-0.369387	6.14509	7.16e-07	0
SLC22A23	0.912551	6.14388	7.18e-07	0
SOX10	-0.576137	6.13847	7.27e-07	0
FAM108C1	0.95183	6.12843	7.44e-07	0
H1F0	0.837454	6.11407	7.69e-07	0
HSPB2	-0.453387	6.11351	7.7e-07	0
CXCR7	-0.342939	6.09963	7.95e-07	0
C1orf85	1.04592	6.09583	8.02e-07	0
AQP1	-0.866654	6.0942	8.05e-07	0
MFAP5	-0.749998	6.08197	8.28e-07	0
NTRK2	-0.590526	6.07988	8.32e-07	0
ATP2C1	0.780859	6.07988	8.32e-07	0
BNIP3	1.04346	6.07883	8.34e-07	0
NRP2	-0.437228	6.07831	8.35e-07	0
FAM125B	-0.305948	6.07366	8.44e-07	0
HMG20B	0.627488	6.06956	8.52e-07	0
SLC37A1	0.466295	6.06803	8.55e-07	0
PTPRJ	0.457191	6.05453	8.82e-07	0
KCNJ15	-0.330147	6.04431	9.03e-07	0
KDELR2	0.951785	6.04431	9.03e-07	0
LOC100132116	-0.88571	6.04431	9.03e-07	0
ST6GALNAC6	-0.448313	6.04144	9.09e-07	0
SMARCAD1	0.593325	6.03012	9.33e-07	0
KCNIP2	-0.289752	6.02826	9.37e-07	0
MOGS	0.447415	6.02687	9.4e-07	0
CTF1	-0.487344	6.02503	9.44e-07	0
CEP164	-0.394687	6.02273	9.49e-07	0
SV2A	-0.766111	6.02091	9.53e-07	0
PHF19	-0.415648	6.00966	9.78e-07	0
TMEM155	-0.317557	6.00922	9.79e-07	0
DAB2IP	-0.343207	6.00877	9.8e-07	0
TRAPPC9	-0.313488	6.00745	9.83e-07	0
CD248	-0.467656	5.97469	1.06e-06	0
CERCAM	-0.476063	5.96257	1.09e-06	0
AHNAK	-0.337174	5.95861	1.1e-06	0
KIAA0319L	0.513951	5.95468	1.11e-06	0
KLF13	-0.469552	5.95468	1.11e-06	0
ITGA7	-0.796851	5.95468	1.11e-06	0
HOXD9	-0.436579	5.95078	1.12e-06	0
PLD1	-0.24576	5.94692	1.13e-06	0
GLIS2	-0.463923	5.94692	1.13e-06	0
SFRS9	0.595649	5.9393	1.15e-06	0
MARCKSL1	1.42283	5.93554	1.16e-06	0
HSPB6	-1.79195	5.92445	1.19e-06	1
SLCO3A1	-0.353912	5.92445	1.19e-06	0
CELSR2	-0.401664	5.92445	1.19e-06	0
FAM174B	0.586768	5.92082	1.2e-06	0
C2orf88	-0.381875	5.91009	1.23e-06	0
PRKCH	0.468654	5.90309	1.25e-06	0
GALNT7	1.75553	5.90309	1.25e-06	0
ZNF697	0.580365	5.86646	1.36e-06	0
FUCA1	1.12529	5.86012	1.38e-06	0
SLC35F2	1.384	5.86012	1.38e-06	0
TMEM200B	-1.51696	5.85078	1.41e-06	0
SPNS2	-0.445392	5.84164	1.44e-06	0
RPL7A	0.477572	5.84164	1.44e-06	0
MYOZ1	-0.670156	5.83565	1.46e-06	0
PANK2	-0.324994	5.82974	1.48e-06	0
ZNF528	0.391618	5.82974	1.48e-06	0
FAAH	0.832859	5.80967	1.55e-06	0
SPRYD3	-0.305352	5.80967	1.55e-06	0
LIN37	-0.451034	5.7986	1.59e-06	0
NDRG2	-0.533783	5.79588	1.6e-06	0
CMTM4	0.791612	5.79588	1.6e-06	0
KRT76	0.376212	5.79588	1.6e-06	0
PCGF5	-0.39222	5.79588	1.6e-06	0
MAPKBP1	-0.465226	5.79588	1.6e-06	0
PPP1R14A	-0.817358	5.79048	1.62e-06	0
GCNT2	1.23703	5.79048	1.62e-06	0
PASK	0.666197	5.78781	1.63e-06	0
ARAP3	-0.530329	5.78516	1.64e-06	0
DZIP1	-0.453858	5.78516	1.64e-06	0
PLBD1	-0.402924	5.77728	1.67e-06	0
UBE2I	-0.26477	5.77728	1.67e-06	0
SYNGR1	-0.45095	5.76955	1.7e-06	0
PPAPDC1B	1.19775	5.76955	1.7e-06	0
FAM107A	-0.886589	5.75449	1.76e-06	0
GGPS1	0.468732	5.73993	1.82e-06	0
LOC644192	-0.453082	5.73283	1.85e-06	0
ZSWIM3	-0.421958	5.73283	1.85e-06	0
C11orf95	-0.486741	5.73049	1.86e-06	0
PLXNA2	-0.317736	5.71897	1.91e-06	0
LYST	-0.461715	5.71444	1.93e-06	0
PADI3	-0.381603	5.71444	1.93e-06	0
PITPNM2	-0.447243	5.71444	1.93e-06	0
CYB561	0.834182	5.70333	1.98e-06	0
CRTAC1	-0.334349	5.69897	2e-06	0
MBOAT2	1.5399	5.69897	2e-06	0
MARK4	-0.538973	5.6925	2.03e-06	0
PRSS35	-0.44274	5.6925	2.03e-06	0
NAPA	0.43678	5.68403	2.07e-06	0
CRYAB	-1.3391	5.68403	2.07e-06	0
DCXR	1.05397	5.67985	2.09e-06	0
IQCA1	-0.293961	5.67778	2.1e-06	0
ATP6AP1	0.88419	5.67366	2.12e-06	0
C12orf51	0.309681	5.67162	2.13e-06	0
DDOST	0.719804	5.65956	2.19e-06	0
DDB2	-0.653376	5.65758	2.2e-06	0
TMBIM6	0.790618	5.65758	2.2e-06	0
KCTD7	-0.384923	5.65561	2.21e-06	0
FABP3	-0.605414	5.65561	2.21e-06	0
VAMP1	-0.664444	5.65561	2.21e-06	0
MEOX1	-0.501212	5.65561	2.21e-06	0
SLC25A33	0.893759	5.6517	2.23e-06	0
FXYD3	1.13098	5.6517	2.23e-06	0
C11orf75	1.43162	5.6517	2.23e-06	0
NOSIP	-0.479456	5.6517	2.23e-06	0
FBLN2	-0.582557	5.64782	2.25e-06	0
C16orf53	-0.380142	5.64782	2.25e-06	0
PPM1H	0.941387	5.64397	2.27e-06	0
HBB	-1.13848	5.63827	2.3e-06	0
FBXL2	-0.439465	5.62709	2.36e-06	0
PODXL2	0.621422	5.62709	2.36e-06	0
ASPH	-0.438452	5.61979	2.4e-06	0
TMPRSS4	-0.950629	5.60906	2.46e-06	0
BCAR3	-0.481561	5.60033	2.51e-06	0
PELI3	-0.37889	5.59517	2.54e-06	0
TCAP	-0.720612	5.59346	2.55e-06	0
SYNGR2	0.759802	5.5867	2.59e-06	0
PDE4DIP	-0.340936	5.57025	2.69e-06	0
IDS	-0.333315	5.56067	2.75e-06	0
KIAA1529	-0.435077	5.5544	2.79e-06	0
SRPX	-0.776057	5.55284	2.8e-06	0
LOC100130955	-0.524812	5.54821	2.83e-06	0
SPIRE2	-0.394511	5.54821	2.83e-06	0
LOC100289090	-0.4955	5.54668	2.84e-06	0
MAP7	1.00941	5.53611	2.91e-06	0
VIPR1	1.10801	5.52288	3e-06	0
NOTCH4	-0.405723	5.51713	3.04e-06	0
TNXB	-0.402955	5.50864	3.1e-06	0
LPAR1	-0.653435	5.50169	3.15e-06	0
BRP44	1.24392	5.50169	3.15e-06	0
FAM96A	1.23876	5.49757	3.18e-06	0
CSPG4	-0.480286	5.4908	3.23e-06	0
HIST1H2AC	1.84714	5.48413	3.28e-06	0
CCDC7	-0.407023	5.4828	3.29e-06	0
SYT11	-0.465395	5.47496	3.35e-06	0
PCGF2	-0.413273	5.47108	3.38e-06	0
GAS6	-0.519667	5.46092	3.46e-06	0
TBC1D22A	-0.432317	5.45967	3.47e-06	0
GIMAP8	-0.47045	5.45967	3.47e-06	0
DGKZ	-0.480311	5.45842	3.48e-06	0
CAV2	-0.631967	5.44855	3.56e-06	0
NUP210	0.455521	5.44855	3.56e-06	0
DCN	-1.02847	5.44855	3.56e-06	0
FRMD3	-0.283872	5.44855	3.56e-06	0
KIAA1244	1.18404	5.4437	3.6e-06	0
LOC646241	0.392767	5.4389	3.64e-06	0
STAP2	0.789006	5.43652	3.66e-06	0
LDLRAD3	0.471773	5.43297	3.69e-06	0
PIK3R1	-0.742068	5.42829	3.73e-06	0
PDE2A	-0.524852	5.42481	3.76e-06	0
GALT	-0.336295	5.42481	3.76e-06	0
RIMS4	-0.408703	5.42481	3.76e-06	0
TUSC3	0.752971	5.42022	3.8e-06	0
EZH1	-0.382278	5.42022	3.8e-06	0
ZNF703	-0.502172	5.41005	3.89e-06	0
DOPEY1	-0.34351	5.40012	3.98e-06	0
ARL3	-0.317144	5.40012	3.98e-06	0
TET3	0.366167	5.40012	3.98e-06	0
ABLIM1	-0.742807	5.40012	3.98e-06	0
HOXB6	-0.890097	5.39794	4e-06	0
SLC17A5	0.789648	5.39794	4e-06	0
VAMP8	0.774453	5.39041	4.07e-06	0
RPS6KA1	0.551612	5.38934	4.08e-06	0
TTC6	0.939271	5.38934	4.08e-06	0
SYAP1	0.879	5.38934	4.08e-06	0
NECAB3	0.804644	5.38405	4.13e-06	0
TGFBR2	-0.711972	5.38091	4.16e-06	0
NAV1	-0.556938	5.37572	4.21e-06	0
NFATC4	-0.537482	5.37263	4.24e-06	0
NDUFV2	0.934427	5.36653	4.3e-06	0
CIC	-0.356464	5.36552	4.31e-06	0
SLC29A1	-0.45287	5.35262	4.44e-06	0
UTRN	0.9414	5.35164	4.45e-06	0
EBF1	-0.497505	5.34486	4.52e-06	0
C20orf24	0.432549	5.3439	4.53e-06	0
THRA	-0.354438	5.3439	4.53e-06	0
FASN	1.32618	5.34294	4.54e-06	0
SURF4	0.594678	5.34294	4.54e-06	0
C17orf72	-0.411866	5.34294	4.54e-06	0
GLI2	-0.390923	5.33819	4.59e-06	0
HR	-0.26374	5.32975	4.68e-06	0
MAPK3	-0.34078	5.32975	4.68e-06	0
CANT1	1.15896	5.32883	4.69e-06	0
C1orf204	-0.401909	5.32883	4.69e-06	0
RIMS3	-0.353373	5.32606	4.72e-06	0
C6orf145	-0.366194	5.32057	4.78e-06	0
CNPY2	0.490958	5.31605	4.83e-06	0
C19orf10	0.531653	5.31426	4.85e-06	0
RGN	-0.660003	5.31247	4.87e-06	0
MSMB	2.51798	5.29158	5.11e-06	1
TM9SF2	1.08136	5.28483	5.19e-06	0
MTCH2	0.679817	5.28483	5.19e-06	0
ZNF615	1.62825	5.27901	5.26e-06	0
COBLL1	0.640492	5.27654	5.29e-06	0
TMC5	1.29347	5.26841	5.39e-06	0
HSD3B7	-0.548241	5.26122	5.48e-06	0
RDH11	1.4176	5.26122	5.48e-06	0
CBFA2T2	0.674555	5.26122	5.48e-06	0
LOC401134	-0.255294	5.26043	5.49e-06	0
HOXB5	-0.355894	5.25964	5.5e-06	0
PTPRF	0.596808	5.25493	5.56e-06	0
PGM3	0.946811	5.25104	5.61e-06	0
SNAPC1	-0.525315	5.24795	5.65e-06	0
MECOM	-0.317376	5.24109	5.74e-06	0
ARHGAP23	-0.453349	5.23433	5.83e-06	0
C20orf3	0.717916	5.23433	5.83e-06	0
QSOX1	-0.462302	5.23433	5.83e-06	0
ANGPTL2	-0.714337	5.22185	6e-06	0
IL11RA	-0.485695	5.2204	6.02e-06	0
LGR6	-0.655302	5.21112	6.15e-06	0
ADRB1	0.725901	5.19997	6.31e-06	0
OCA2	-0.456581	5.19654	6.36e-06	0
ABI3BP	-0.323942	5.19518	6.38e-06	0
CLCA4	-0.767537	5.19518	6.38e-06	0
CDK18	-0.671539	5.19518	6.38e-06	0
MYO5C	1.295	5.19314	6.41e-06	0
PWRN1	-0.286256	5.18509	6.53e-06	0
RHOV	-0.444343	5.18111	6.59e-06	0
LOC100288758	-0.500683	5.18111	6.59e-06	0
CASZ1	0.527714	5.1798	6.61e-06	0
ADAMTS5	-0.302457	5.1798	6.61e-06	0
NPR2	-0.578566	5.1798	6.61e-06	0
C1orf116	1.36667	5.17914	6.62e-06	0
HSPB7	-0.557118	5.17653	6.66e-06	0
SCARA3	-0.820614	5.17653	6.66e-06	0
MRAS	-0.470421	5.16877	6.78e-06	0
OLFML2A	-0.631953	5.16877	6.78e-06	0
ITGB6	-0.489377	5.16813	6.79e-06	0
FSCN1	-0.58953	5.16685	6.81e-06	0
ZCCHC24	-0.537253	5.16304	6.87e-06	0
TNPO2	-0.26836	5.16115	6.9e-06	0
CD46	0.665509	5.15739	6.96e-06	0
ITGB1BP2	-0.403457	5.15552	6.99e-06	0
MYPOP	-0.487205	5.15243	7.04e-06	0
GNAO1	-0.61567	5.15058	7.07e-06	0
NOVA2	-0.340751	5.14874	7.1e-06	0
CD40	-0.483161	5.14026	7.24e-06	0
LAMA2	-0.3402	5.13966	7.25e-06	0
KLF5	-1.06153	5.13906	7.26e-06	0
TUB	-0.359812	5.1349	7.33e-06	0
PPME1	0.435722	5.13077	7.4e-06	0
CXCL17	-1.53486	5.13077	7.4e-06	0
C15orf59	-0.534633	5.13077	7.4e-06	0
PDZD4	-0.463888	5.13077	7.4e-06	0
PWWP2B	-0.349684	5.13077	7.4e-06	0
MINK1	-0.472185	5.12263	7.54e-06	0
FOXN1	-0.529957	5.11919	7.6e-06	0
TMED3	0.631887	5.11919	7.6e-06	0
GPSM1	-0.436127	5.11691	7.64e-06	0
S100A16	-0.816523	5.11691	7.64e-06	0
KIFC3	-0.449605	5.11634	7.65e-06	0
GLB1L2	0.869603	5.11295	7.71e-06	0
SLC2A12	1.43821	5.11014	7.76e-06	0
AIM1L	-0.399268	5.11014	7.76e-06	0
NTN1	-0.395857	5.11014	7.76e-06	0
FAM46A	-0.592983	5.10846	7.79e-06	0
ATP1A4	-0.330167	5.09909	7.96e-06	0
ASS1	-1.0349	5.09691	8e-06	0
EMB	0.9343	5.09259	8.08e-06	0
NRTN	-0.611092	5.09259	8.08e-06	0
RBPMS	-0.768602	5.08619	8.2e-06	0
SGCG	-0.505796	5.08619	8.2e-06	0
SLC47A1	-0.770743	5.08197	8.28e-06	0
GRIA3	-0.312982	5.0804	8.31e-06	0
FAM83C	-0.295019	5.0804	8.31e-06	0
GPR109B	-0.525481	5.07727	8.37e-06	0
SLC12A2	1.20296	5.07727	8.37e-06	0
MRPL48	0.552803	5.07727	8.37e-06	0
CBX6	-0.606694	5.07417	8.43e-06	0
COBL	0.935187	5.07058	8.5e-06	0
PIGM	0.349171	5.06905	8.53e-06	0
SLIT2	-0.746119	5.06098	8.69e-06	0
AHDC1	-0.342771	5.06098	8.69e-06	0
FLJ27352	0.756595	5.06098	8.69e-06	0
FAM111A	0.631167	5.05651	8.78e-06	0
CCDC154	0.684467	5.05257	8.86e-06	0
BCL2	-0.297799	5.05257	8.86e-06	0
CRYL1	0.623963	5.05159	8.88e-06	0
DGKD	0.615986	5.04866	8.94e-06	0
C3orf25	1.20159	5.04383	9.04e-06	0
ADH1B	-0.357298	5.04191	9.08e-06	0
NDRG4	-0.657316	5.04144	9.09e-06	0
AMD1	1.75581	5.03433	9.24e-06	0
SFXN3	-0.326731	5.03433	9.24e-06	0
ATP1A2	-1.08741	5.03292	9.27e-06	0
PGF	-0.350663	5.03245	9.28e-06	0
C1QL1	-0.590701	5.03152	9.3e-06	0
C17orf51	-0.363733	5.03152	9.3e-06	0
MGAM	-0.463869	5.03058	9.32e-06	0
HEY1	-0.399511	5.03012	9.33e-06	0
SLC2A10	1.03652	5.02687	9.4e-06	0
C8orf31	-0.380976	5.02182	9.51e-06	0
PHYHIP	-0.565602	5.02136	9.52e-06	0
RNF103	0.549668	5.01682	9.62e-06	0
TJAP1	-0.349318	5.01682	9.62e-06	0
PHYHIPL	-0.41859	5.01637	9.63e-06	0
LOC283728	-0.499047	5.01637	9.63e-06	0
TMC4	0.940801	5.01412	9.68e-06	0
MRPL44	0.335591	5.01412	9.68e-06	0
S100A14	-0.366148	5.01278	9.71e-06	0
SHISA4	-0.386607	5.00789	9.82e-06	0
CXorf21	-0.436509	5.00087	9.98e-06	0
ADI1	1.13429	5.00087	9.98e-06	0
CIDEB	-0.765541	4.99568	1.01e-05	0
ID3	-0.831406	4.99568	1.01e-05	0
ISL1	-0.728316	4.99568	1.01e-05	0
PLAGL1	-0.35191	4.9914	1.02e-05	0
TGFBR3	-0.929032	4.9914	1.02e-05	0
WDR76	-0.295715	4.9914	1.02e-05	0
CD55	-0.772495	4.98297	1.04e-05	0
SMS	1.70826	4.98297	1.04e-05	0
FBXW12	-0.289408	4.97881	1.05e-05	0
AGPAT4	-0.386206	4.97469	1.06e-05	0
FGFR1	-0.512524	4.97469	1.06e-05	0
PLEKHB2	0.527206	4.97062	1.07e-05	0
LOC100288496	-0.327973	4.97062	1.07e-05	0
GPD1	-0.310161	4.97062	1.07e-05	0
LTBP3	-0.381678	4.97062	1.07e-05	0
PODN	-0.597432	4.96658	1.08e-05	0
TMCO4	0.475283	4.95861	1.1e-05	0
ALKBH8	-0.275498	4.95861	1.1e-05	0
LOC100294391	-0.459873	4.95861	1.1e-05	0
CLCN3	0.726385	4.95468	1.11e-05	0
UROD	-0.245967	4.95468	1.11e-05	0
SEC61A1	0.540509	4.95468	1.11e-05	0
FEZ1	-0.420635	4.95468	1.11e-05	0
LCAT	-0.449135	4.95468	1.11e-05	0
PDGFRB	-0.444114	4.95468	1.11e-05	0
MYOM1	-0.624028	4.95078	1.12e-05	0
ZBTB4	-0.437459	4.95078	1.12e-05	0
PRPH	-0.508172	4.95078	1.12e-05	0
CDH19	-0.242236	4.9431	1.14e-05	0
LOC146513	-0.468726	4.9431	1.14e-05	0
B3GNT9	-0.586183	4.9431	1.14e-05	0
BACH1	0.365117	4.9431	1.14e-05	0
ARHGAP8	0.684387	4.9393	1.15e-05	0
RBM12B	-0.207218	4.92812	1.18e-05	0
ANKRD11	-0.267912	4.92445	1.19e-05	0
ZNF692	0.476616	4.92445	1.19e-05	0
SPOCK1	2.00483	4.92445	1.19e-05	0
ABAT	1.22998	4.92445	1.19e-05	0
KIRREL	-0.473315	4.92445	1.19e-05	0
GPT2	0.855498	4.92445	1.19e-05	0
CCDC15	0.384044	4.92082	1.2e-05	0
TIMM44	-0.272234	4.92082	1.2e-05	0
MCM3	-0.388472	4.92082	1.2e-05	0
BCL7C	-0.371199	4.91364	1.22e-05	0
CDH2	-0.441447	4.91364	1.22e-05	0
SPATA13	0.617988	4.91009	1.23e-05	0
CDH23	-0.398546	4.91009	1.23e-05	0
MPP2	-0.394581	4.91009	1.23e-05	0
EMCN	-0.32114	4.91009	1.23e-05	0
NDUFA2	0.314879	4.91009	1.23e-05	0
C9orf125	-0.384142	4.91009	1.23e-05	0
SDF4	0.496576	4.90309	1.25e-05	0
TYRO3	-0.31811	4.8962	1.27e-05	0
PAICS	0.506338	4.89279	1.28e-05	0
STARD3	-0.49275	4.89279	1.28e-05	0
PCBD1	0.552804	4.89279	1.28e-05	0
PDGFRA	-0.362346	4.89279	1.28e-05	0
SLC30A4	1.6225	4.88606	1.3e-05	0
COG5	0.68341	4.88273	1.31e-05	0
RRP1	-0.333171	4.87943	1.32e-05	0
NOP14	-0.411815	4.87943	1.32e-05	0
MAMDC2	-0.722225	4.87943	1.32e-05	0
QPRT	-0.622783	4.87943	1.32e-05	0
CALHM2	-0.507491	4.87943	1.32e-05	0
HOXB3	-0.37319	4.86967	1.35e-05	0
C17orf28	0.607865	4.86646	1.36e-05	0
JTB	0.672669	4.86012	1.38e-05	0
GLUD2	0.404168	4.86012	1.38e-05	0
RUNDC1	0.554726	4.86012	1.38e-05	0
APCDD1L	-0.297375	4.85699	1.39e-05	0
NMRAL1	0.345885	4.85078	1.41e-05	0
C9orf152	1.33187	4.85078	1.41e-05	0
RAN	0.639911	4.85078	1.41e-05	0
IGDCC4	-0.316504	4.84771	1.42e-05	0
NSMCE1	0.767534	4.84771	1.42e-05	0
SNCG	-0.40634	4.84771	1.42e-05	0
SOAT1	1.18662	4.84771	1.42e-05	0
SLC25A37	0.547342	4.84466	1.43e-05	0
HIGD1B	-0.427008	4.84466	1.43e-05	0
KCNMB1	-0.819439	4.84164	1.44e-05	0
LOC440863	-0.389541	4.83863	1.45e-05	0
GLUD1	1.05905	4.83863	1.45e-05	0
BNC2	-0.324498	4.83565	1.46e-05	0
GAS7	-0.432884	4.82974	1.48e-05	0
LOC203274	-0.86967	4.82681	1.49e-05	0
DNAJB4	-0.532047	4.82681	1.49e-05	0
RAB7B	-0.315071	4.82681	1.49e-05	0
ELN	-0.928692	4.82391	1.5e-05	0
ADAM10	0.612551	4.82391	1.5e-05	0
C7orf41	-0.467338	4.82391	1.5e-05	0
LYPD3	-0.391968	4.82391	1.5e-05	0
BHLHE23	0.678997	4.82102	1.51e-05	0
HOXB7	-0.48754	4.82102	1.51e-05	0
ASB15	-0.370851	4.81816	1.52e-05	0
SCGB3A2	-0.393237	4.81816	1.52e-05	0
C19orf60	-0.37718	4.81816	1.52e-05	0
LOC100289378	-0.499943	4.81816	1.52e-05	0
ZG16B	1.05446	4.81816	1.52e-05	0
ZNF853	-0.421678	4.81531	1.53e-05	0
HSPB8	-0.918532	4.81248	1.54e-05	0
HIST2H2BE	1.70833	4.81248	1.54e-05	0
PNMT	-0.466272	4.80967	1.55e-05	0
ZFP1	-0.262053	4.80967	1.55e-05	0
RFX2	-0.497474	4.80688	1.56e-05	0
NHEDC2	-0.44761	4.80688	1.56e-05	0
RREB1	0.28478	4.80688	1.56e-05	0
CHKA	0.416269	4.8041	1.57e-05	0
MRPL17	0.518836	4.8041	1.57e-05	0
C11orf9	-0.368011	4.8041	1.57e-05	0
DARC	-0.657603	4.8041	1.57e-05	0
GRASP	-0.357129	4.8041	1.57e-05	0
SEC11C	1.44	4.8041	1.57e-05	0
RSPO1	-0.416686	4.7986	1.59e-05	0
SCRN2	-0.427964	4.7986	1.59e-05	0
CYP4F12	-0.523085	4.7986	1.59e-05	0
AATK	-0.46193	4.7986	1.59e-05	0
TTLL12	0.634283	4.7986	1.59e-05	0
HOXB8	-0.538526	4.79048	1.62e-05	0
LOC440356	0.395915	4.79048	1.62e-05	0
PCP4L1	-0.674782	4.78781	1.63e-05	0
CLIC1	0.420967	4.78252	1.65e-05	0
SEC16A	0.938691	4.78252	1.65e-05	0
DKK3	-0.419321	4.77728	1.67e-05	0
AKR1A1	0.417876	4.77469	1.68e-05	0
SPG20	-0.297803	4.77469	1.68e-05	0
APOA1BP	0.764147	4.77211	1.69e-05	0
SEL1L3	0.625706	4.77211	1.69e-05	0
PTGDS	-1.53465	4.77211	1.69e-05	0
VWCE	-0.413037	4.77211	1.69e-05	0
GFOD1	-0.315656	4.77211	1.69e-05	0
HN1L	0.862132	4.767	1.71e-05	0
JAM3	-0.760962	4.767	1.71e-05	0
POLH	-0.249982	4.767	1.71e-05	0
SEL1L	0.683453	4.767	1.71e-05	0
DNM1	-0.777559	4.767	1.71e-05	0
LOC100132625	-0.369821	4.76195	1.73e-05	0
STAT5A	-0.412089	4.76195	1.73e-05	0
TSC22D1	0.851727	4.75945	1.74e-05	0
LOC154761	-0.517096	4.75449	1.76e-05	0
PALM3	-0.636853	4.75449	1.76e-05	0
MAP3K12	-0.532048	4.75449	1.76e-05	0
JUB	-0.212871	4.75449	1.76e-05	0
TSTA3	0.682062	4.75449	1.76e-05	0
AKAP1	0.444465	4.75449	1.76e-05	0
MOCS1	-0.351738	4.75203	1.77e-05	0
LRP4	-0.392577	4.75203	1.77e-05	0
ZNF474	0.636272	4.74958	1.78e-05	0
SGMS2	0.544414	4.74232	1.81e-05	0
NAB2	-0.396933	4.73993	1.82e-05	0
NR3C2	-0.352448	4.73755	1.83e-05	0
MFI2	-0.347769	4.73518	1.84e-05	0
PPP1R7	0.334415	4.73283	1.85e-05	0
DHRS2	-0.335992	4.73283	1.85e-05	0
HSCB	-0.39048	4.73283	1.85e-05	0
GSTZ1	0.418641	4.73049	1.86e-05	0
KRT7	-0.339074	4.7167	1.92e-05	0
CEP68	-0.285808	4.71444	1.93e-05	0
TUBA1A	-0.817498	4.7122	1.94e-05	0
TWIST2	-0.615286	4.7122	1.94e-05	0
PHKA1	0.385992	4.7122	1.94e-05	0
SLC39A9	0.346761	4.70774	1.96e-05	0
DDI2	0.457091	4.70553	1.97e-05	0
RPS2	0.567651	4.70115	1.99e-05	0
UAP1	1.43949	4.69897	2e-05	0
ST3GAL1	-0.40081	4.69897	2e-05	0
KIAA1462	-0.526307	4.6968	2.01e-05	0
ABHD10	0.527049	4.69465	2.02e-05	0
GNG11	-0.515993	4.68825	2.05e-05	0
RAB3A	-0.437901	4.68613	2.06e-05	0
SNX25	0.418382	4.68613	2.06e-05	0
GOLPH3	0.667057	4.68403	2.07e-05	0
ARL6IP4	-0.316598	4.67366	2.12e-05	0
C5orf56	-0.53368	4.67162	2.13e-05	0
ARFRP1	-0.298238	4.67162	2.13e-05	0
C20orf199	0.670479	4.67162	2.13e-05	0
NDUFA8	0.492109	4.66756	2.15e-05	0
TM9SF4	0.374779	4.66756	2.15e-05	0
DFNA5	-0.673758	4.66555	2.16e-05	0
PALM	-0.550449	4.66555	2.16e-05	0
LOC100130837	0.288719	4.66354	2.17e-05	0
GPR161	-0.409666	4.65758	2.2e-05	0
MFN2	-0.338899	4.65561	2.21e-05	0
NGFR	-0.368644	4.65365	2.22e-05	0
ARHGEF17	-0.300132	4.64397	2.27e-05	0
SEPT7	-0.358146	4.64207	2.28e-05	0
PRODH	-0.464441	4.63827	2.3e-05	0
ANK2	-0.410419	4.63451	2.32e-05	0
SLC9A2	0.633189	4.63078	2.34e-05	0
HDAC10	-0.309632	4.62342	2.38e-05	0
TAF3	-0.268083	4.62342	2.38e-05	0
LOC401588	0.3425	4.62342	2.38e-05	0
NEDD4L	1.05537	4.6216	2.39e-05	0
DDX19A	-0.267961	4.6216	2.39e-05	0
RAB25	0.936599	4.6216	2.39e-05	0
ANO1	-0.859637	4.6216	2.39e-05	0
SLC4A11	-0.316787	4.6216	2.39e-05	0
PRAC	1.75485	4.6216	2.39e-05	0
NFE2L1	-0.334519	4.6216	2.39e-05	0
HOXD10	-0.863522	4.6216	2.39e-05	0
SCGB1A1	-2.32465	4.61979	2.4e-05	1
LMO3	-0.327099	4.61798	2.41e-05	0
AUH	0.996797	4.61798	2.41e-05	0
MNT	-0.312273	4.61798	2.41e-05	0
TMEM20	-0.236758	4.61798	2.41e-05	0
LRTOMT	0.382169	4.61798	2.41e-05	0
REG3G	-0.36511	4.61798	2.41e-05	0
C19orf63	0.455766	4.61618	2.42e-05	0
AP1G1	0.564138	4.61618	2.42e-05	0
GNAZ	-0.527523	4.61618	2.42e-05	0
PIKFYVE	0.646672	4.61439	2.43e-05	0
TRANK1	-0.542348	4.61439	2.43e-05	0
ARFGEF2	0.30097	4.61439	2.43e-05	0
PRAF2	-0.590853	4.61083	2.45e-05	0
RNF112	-0.66087	4.60555	2.48e-05	0
KRT19	-0.725547	4.60206	2.5e-05	0
LRMP	-0.361021	4.60206	2.5e-05	0
ATP6V1G1	0.690212	4.5986	2.52e-05	0
SOX15	-0.432402	4.59688	2.53e-05	0
PRICKLE1	-0.277542	4.59688	2.53e-05	0
HOXC10	-0.373527	4.59688	2.53e-05	0
ACSL1	1.5471	4.59346	2.55e-05	0
CNTNAP2	1.49627	4.59176	2.56e-05	0
ARL15	0.628345	4.59176	2.56e-05	0
BIK	0.626898	4.59176	2.56e-05	0
BAIAP2L1	0.771753	4.59176	2.56e-05	0
LRFN5	-0.388826	4.59007	2.57e-05	0
PCGF3	0.408875	4.59007	2.57e-05	0
RASL10B	-0.384821	4.59007	2.57e-05	0
NR0B2	-0.339781	4.5867	2.59e-05	0
TRPC1	-0.4327	4.5817	2.62e-05	0
PTPN13	-0.293137	4.58004	2.63e-05	0
SYNE1	-0.453185	4.5784	2.64e-05	0
FRMD6	-0.44768	4.57512	2.66e-05	0
RAB34	-0.718107	4.57187	2.68e-05	0
NCRNA00188	0.377839	4.57025	2.69e-05	0
NFASC	-0.556154	4.57025	2.69e-05	0
CCND1	-0.562847	4.56864	2.7e-05	0
ATP6V0B	0.572834	4.56225	2.74e-05	0
CACHD1	-0.349659	4.55909	2.76e-05	0
AZGP1P1	1.03793	4.55909	2.76e-05	0
DOCK4	0.372629	4.55596	2.78e-05	0
MMP2	-0.326786	4.55596	2.78e-05	0
DSC2	1.29705	4.5544	2.79e-05	0
MAGED1	0.911794	4.55129	2.81e-05	0
TAF9	0.587951	4.54975	2.82e-05	0
EPN3	0.5451	4.54516	2.85e-05	0
VEPH1	-0.267438	4.54516	2.85e-05	0
RHOU	1.14983	4.54363	2.86e-05	0
CHP2	-0.332788	4.54212	2.87e-05	0
DMPK	-0.364984	4.54212	2.87e-05	0
ZMIZ2	-0.351172	4.5376	2.9e-05	0
SAMM50	-0.272516	4.53611	2.91e-05	0
SMOC1	-0.884843	4.53018	2.95e-05	0
SLC6A3	-0.377735	4.53018	2.95e-05	0
ASPDH	-0.345903	4.52724	2.97e-05	0
ENDOD1	1.00617	4.52143	3.01e-05	0
DSG2	1.12908	4.5157	3.05e-05	0
KPTN	-0.416508	4.51286	3.07e-05	0
ZNF420	-0.264504	4.50446	3.13e-05	0
C4orf14	0.676545	4.50307	3.14e-05	0
KIAA1377	-0.253139	4.50031	3.16e-05	0
ZNF577	1.28239	4.49894	3.17e-05	0
SPDEF	0.426784	4.49621	3.19e-05	0
C1orf69	-0.276519	4.49485	3.2e-05	0
AKR1C1	-0.329524	4.49214	3.22e-05	0
SPEG	-0.359327	4.48678	3.26e-05	0
NASP	-0.243257	4.48413	3.28e-05	0
MIA3	0.960494	4.48413	3.28e-05	0
IL17RB	0.720231	4.48413	3.28e-05	0
HDAC6	-0.250112	4.4828	3.29e-05	0
TRNAU1AP	-0.222001	4.4828	3.29e-05	0
GGTA1	-0.404022	4.4828	3.29e-05	0
PLXND1	-0.33329	4.47625	3.34e-05	0
DUSP26	-0.390187	4.47496	3.35e-05	0
JPH4	-0.711125	4.47237	3.37e-05	0
FOXP1	0.598402	4.4698	3.39e-05	0
ENAH	-0.419365	4.46852	3.4e-05	0
COQ7	0.39888	4.46852	3.4e-05	0
MUTYH	-0.418784	4.46344	3.44e-05	0
RARG	-0.34105	4.45967	3.47e-05	0
TMEM199	0.289513	4.45967	3.47e-05	0
RPUSD1	-0.383385	4.45967	3.47e-05	0
G3BP2	0.690591	4.45717	3.49e-05	0
ZNF205	-0.398245	4.45593	3.5e-05	0
ARL2BP	-0.340502	4.45469	3.51e-05	0
EIF4ENIF1	-0.333275	4.45469	3.51e-05	0
C6orf57	0.599125	4.45346	3.52e-05	0
RNF144B	0.958051	4.451	3.54e-05	0
CHP	0.619095	4.451	3.54e-05	0
COX19	-0.299651	4.44733	3.57e-05	0
DPY30	0.697359	4.44733	3.57e-05	0
NAA35	0.413506	4.44612	3.58e-05	0
SLC7A6OS	-0.375417	4.44612	3.58e-05	0
CXCL12	-0.820613	4.44612	3.58e-05	0
FGF11	-0.337147	4.44612	3.58e-05	0
HEG1	-0.483118	4.44129	3.62e-05	0
FBXL21	-0.394176	4.44129	3.62e-05	0
SAMD4A	-0.347762	4.44129	3.62e-05	0
METAP1	0.719014	4.43771	3.65e-05	0
LOC344595	-0.843336	4.43771	3.65e-05	0
SPIN3	0.343386	4.43652	3.66e-05	0
NAGS	-0.388386	4.42829	3.73e-05	0
EVC2	-0.345828	4.42829	3.73e-05	0
COL16A1	-0.596771	4.42713	3.74e-05	0
CYP2A13	-0.288824	4.42366	3.77e-05	0
FLJ30901	-0.454233	4.42251	3.78e-05	0
CD97	-0.447469	4.42251	3.78e-05	0
RANBP6	-0.427577	4.42136	3.79e-05	0
SSBP2	-0.377982	4.41454	3.85e-05	0
SSTR2	-0.310507	4.41341	3.86e-05	0
PPAPDC2	0.792577	4.41229	3.87e-05	0
HS3ST3A1	-0.580059	4.41229	3.87e-05	0
LYPLA1	0.727734	4.41005	3.89e-05	0
WWC1	0.363366	4.40561	3.93e-05	0
C14orf139	-0.532669	4.40561	3.93e-05	0
RAB27B	0.960796	4.40561	3.93e-05	0
COL4A6	-0.550873	4.4034	3.95e-05	0
SLPI	-2.39118	4.40012	3.98e-05	1
TMEM150A	-0.476758	4.39794	4e-05	0
ARCN1	0.575185	4.39686	4.01e-05	0
KANK2	-0.343702	4.39686	4.01e-05	0
LOC727916	0.346951	4.39686	4.01e-05	0
MYO7A	-0.347968	4.39686	4.01e-05	0
GALNTL1	-0.394689	4.39686	4.01e-05	0
EPHB4	-0.321175	4.39686	4.01e-05	0
SEC13	0.422291	4.39362	4.04e-05	0
PGM5P1	-0.33928	4.39362	4.04e-05	0
CCDC80	-1.11083	4.39254	4.05e-05	0
DENND2A	-0.361802	4.39254	4.05e-05	0
CEACAM6	-0.471038	4.39254	4.05e-05	0
CACNB1	-0.4792	4.38722	4.1e-05	0
CDC42EP2	-0.343784	4.38195	4.15e-05	0
RAB12	-0.580777	4.38091	4.16e-05	0
PRDX4	1.0275	4.37366	4.23e-05	0
SYNPO	-0.315067	4.37263	4.24e-05	0
ZRSR1	0.686417	4.37263	4.24e-05	0
ESRP2	0.582278	4.37161	4.25e-05	0
CATR1	-0.298692	4.36957	4.27e-05	0
LOC401504	0.678467	4.36856	4.28e-05	0
MPRIP	-0.202174	4.36552	4.31e-05	0
SIRT1	0.360759	4.36452	4.32e-05	0
PRKACA	-0.446211	4.36351	4.33e-05	0
KLHL12	0.566035	4.36351	4.33e-05	0
DSP	0.846878	4.36051	4.36e-05	0
ECM1	-0.561578	4.36051	4.36e-05	0
SLC39A6	1.13589	4.36051	4.36e-05	0
TBCEL	0.488756	4.36051	4.36e-05	0
CCDC151	-0.386533	4.35853	4.38e-05	0
LDB2	-0.516588	4.35655	4.4e-05	0
GLI3	-0.356147	4.35067	4.46e-05	0
ESRP1	1.09611	4.35067	4.46e-05	0
TNNT3	-0.316974	4.34969	4.47e-05	0
NCAPD3	2.02589	4.34679	4.5e-05	0
C11orf80	0.348866	4.34294	4.54e-05	0
ZNF182	-0.279069	4.34104	4.56e-05	0
TMEM119	-1.03899	4.34104	4.56e-05	0
PRB1	0.378175	4.34008	4.57e-05	0
SIM2	0.876268	4.33913	4.58e-05	0
SLC30A3	-0.455858	4.33913	4.58e-05	0
PVRL2	0.64833	4.33819	4.59e-05	0
LOC493754	-0.347697	4.3363	4.61e-05	0
PDIA3	0.743252	4.33536	4.62e-05	0
LOC344887	0.318942	4.33161	4.66e-05	0
CCDC130	-0.395532	4.33161	4.66e-05	0
TBL1X	-0.509098	4.33068	4.67e-05	0
TIMP3	-0.920861	4.32883	4.69e-05	0
PPM1F	-0.274094	4.3279	4.7e-05	0
LOC349408	-0.379811	4.32698	4.71e-05	0
CCDC125	0.594115	4.32698	4.71e-05	0
PPT2	-0.346995	4.32698	4.71e-05	0
LAMB1	-0.92173	4.32606	4.72e-05	0
INTS3	-0.362596	4.32514	4.73e-05	0
GOLGA5	0.737126	4.32331	4.75e-05	0
NEFM	-0.294165	4.32239	4.76e-05	0
PPAPDC3	-0.343385	4.31785	4.81e-05	0
TRBV7-8	-0.423467	4.31785	4.81e-05	0
B4GALT2	-0.311352	4.31605	4.83e-05	0
FAM55C	-0.298985	4.31605	4.83e-05	0
NLRP7	-0.420196	4.31426	4.85e-05	0
LAMB2	-0.718814	4.31426	4.85e-05	0
CASQ1	-0.527642	4.31247	4.87e-05	0
ITGB4	-0.423472	4.31158	4.88e-05	0
C2orf86	-0.307529	4.3098	4.9e-05	0
FAM73B	-0.323885	4.30803	4.92e-05	0
C1orf106	-0.659323	4.30803	4.92e-05	0
GPR173	-0.279299	4.30803	4.92e-05	0
RRAS	-0.598567	4.30539	4.95e-05	0
ALS2CL	-0.454421	4.30539	4.95e-05	0
TCEAL2	-1.42678	4.30539	4.95e-05	0
ARHGAP33	-0.324653	4.30539	4.95e-05	0
RNF40	-0.270302	4.30364	4.97e-05	0
PTPLB	0.917838	4.30364	4.97e-05	0
PLD2	-0.410505	4.30364	4.97e-05	0
FBXO27	-0.37767	4.3019	4.99e-05	0
MCAM	-0.431345	4.30016	5.01e-05	0
LOC441245	0.445744	4.29757	5.04e-05	0
NCS1	-0.363374	4.29671	5.05e-05	0
STX1A	-0.389328	4.29499	5.07e-05	0
MARS	0.340104	4.29073	5.12e-05	0
MFGE8	-0.283526	4.28651	5.17e-05	0
APOL1	-0.4203	4.28483	5.19e-05	0
RNPC3	-0.401362	4.284	5.2e-05	0
ATP8A1	0.639428	4.28233	5.22e-05	0
CAPN3	-0.430302	4.28233	5.22e-05	0
LOC100133142	-0.358102	4.28067	5.24e-05	0
FLJ40292	0.468686	4.27901	5.26e-05	0
STOX2	-0.235703	4.27819	5.27e-05	0
HSPC159	0.663758	4.27737	5.28e-05	0
KCNJ3	-0.394334	4.27654	5.29e-05	0
SAT1	1.05517	4.27572	5.3e-05	0
NGF	-0.346709	4.27409	5.32e-05	0
LOC90834	-0.367986	4.27409	5.32e-05	0
FBLN5	-1.12204	4.27246	5.34e-05	0
H2BFXP	-0.300182	4.27246	5.34e-05	0
RWDD2A	0.842637	4.27084	5.36e-05	0
PREX2	-0.302841	4.26761	5.4e-05	0
EID2	0.56227	4.2644	5.44e-05	0
YRDC	0.358021	4.2636	5.45e-05	0
TRPT1	0.536434	4.26201	5.47e-05	0
PCA3	0.970603	4.26122	5.48e-05	0
LPCAT2	-0.337988	4.26122	5.48e-05	0
CMPK1	0.605992	4.26043	5.49e-05	0
TIAM1	-0.404891	4.26043	5.49e-05	0
C14orf109	0.788854	4.25806	5.52e-05	0
GK5	0.453252	4.25806	5.52e-05	0
HBXIP	0.557951	4.25414	5.57e-05	0
HCFC1R1	-0.522338	4.25414	5.57e-05	0
TMF1	0.39084	4.25414	5.57e-05	0
C17orf79	0.4938	4.25337	5.58e-05	0
LOC100286895	-0.677787	4.25104	5.61e-05	0
AHR	-0.433695	4.24489	5.69e-05	0
RARRES2	-0.760028	4.24489	5.69e-05	0
ARF1	0.357401	4.24489	5.69e-05	0
RAB27A	1.26915	4.24489	5.69e-05	0
GGT2	0.933078	4.24336	5.71e-05	0
PRMT5	0.449049	4.24185	5.73e-05	0
LOC728701	-0.327066	4.23958	5.76e-05	0
PNPLA7	0.580444	4.23958	5.76e-05	0
CPA6	-0.576827	4.23882	5.77e-05	0
FAM169B	-0.394947	4.23807	5.78e-05	0
GLT8D2	-0.634383	4.23359	5.84e-05	0
DKFZp667E0512	-0.52206	4.23359	5.84e-05	0
NUBP2	-0.40731	4.2321	5.86e-05	0
RBM38	-0.432875	4.2321	5.86e-05	0
APPL2	0.68094	4.22988	5.89e-05	0
AIFM1	0.479693	4.22695	5.93e-05	0
SCUBE1	-0.407064	4.22695	5.93e-05	0
AFTPH	0.465718	4.22695	5.93e-05	0
WDTC1	-0.22673	4.22548	5.95e-05	0
SEC61G	0.59121	4.22548	5.95e-05	0
SPDYE1	-0.486003	4.22548	5.95e-05	0
PEAR1	-0.319173	4.22548	5.95e-05	0
MMP14	-0.395938	4.22403	5.97e-05	0
ZC3HC1	-0.41817	4.22403	5.97e-05	0
ZNF217	1.05398	4.2233	5.98e-05	0
KIAA2018	0.310321	4.22257	5.99e-05	0
TLR3	-0.331152	4.21753	6.06e-05	0
COLEC12	1.14092	4.21753	6.06e-05	0
LOC283194	0.611459	4.21753	6.06e-05	0
C1orf217	-0.410524	4.21538	6.09e-05	0
KCND1	-0.311022	4.21325	6.12e-05	0
LMAN1	0.881407	4.21325	6.12e-05	0
FLJ10357	-0.363663	4.20343	6.26e-05	0
HERPUD1	0.999652	4.20066	6.3e-05	0
SFRP5	-0.435376	4.20066	6.3e-05	0
ROM1	-0.404441	4.20066	6.3e-05	0
C20orf200	-0.551263	4.19997	6.31e-05	0
ZBTB42	0.490409	4.19928	6.32e-05	0
PRSS53	-0.385066	4.19723	6.35e-05	0
IRAK3	-0.353352	4.19723	6.35e-05	0
ODZ3	-0.417392	4.19654	6.36e-05	0
P2RX4	0.618823	4.19654	6.36e-05	0
SDF2	0.474738	4.19518	6.38e-05	0
MYBPC1	1.8207	4.19314	6.41e-05	0
GMCL1	0.54767	4.19179	6.43e-05	0
BOLA2	-0.617936	4.18842	6.48e-05	0
MARCO	-0.385267	4.18842	6.48e-05	0
MRVI1	-0.903842	4.18442	6.54e-05	0
IP6K3	-0.335733	4.1831	6.56e-05	0
C1orf54	-0.601484	4.17718	6.65e-05	0
SH3BP1	-0.527539	4.16494	6.84e-05	0
MKRN1	0.416884	4.16494	6.84e-05	0
JAZF1	-0.842505	4.16368	6.86e-05	0
ADAMTSL5	-0.458996	4.15989	6.92e-05	0
EHD1	-0.293078	4.15802	6.95e-05	0
CPNE5	-0.423287	4.15802	6.95e-05	0
LOC654780	-0.339774	4.15428	7.01e-05	0
AVL9	0.271303	4.15304	7.03e-05	0
AMIGO2	-0.375502	4.15243	7.04e-05	0
CYP1A1	-0.293718	4.15058	7.07e-05	0
SSH3	-0.365378	4.14813	7.11e-05	0
PRICKLE2	-0.587747	4.14509	7.16e-05	0
TBL1XR1	0.679526	4.14327	7.19e-05	0
OR51E2	2.82845	4.13787	7.28e-05	1
EPS8	-0.43412	4.1349	7.33e-05	0
C10orf54	-0.46903	4.1349	7.33e-05	0
PELP1	-0.26136	4.13194	7.38e-05	0
ENTPD5	0.880289	4.12552	7.49e-05	0
MYST1	-0.350171	4.12436	7.51e-05	0
CHRM1	0.872069	4.12263	7.54e-05	0
SERPING1	-0.781172	4.12205	7.55e-05	0
SEC23B	0.607859	4.1209	7.57e-05	0
FOXF2	-0.975621	4.12033	7.58e-05	0
ZBTB7C	-0.504142	4.11862	7.61e-05	0
FAM110C	-0.874651	4.11407	7.69e-05	0
C18orf12	-0.298158	4.1107	7.75e-05	0
LOC202181	-0.590839	4.1107	7.75e-05	0
TEPP	-0.404686	4.11014	7.76e-05	0
KAT2A	-0.309617	4.10958	7.77e-05	0
COL6A2	-0.715057	4.10958	7.77e-05	0
KIT	-0.540612	4.10679	7.82e-05	0
ARNT	-0.206699	4.10403	7.87e-05	0
CASKIN2	-0.361585	4.10403	7.87e-05	0
ANO7	2.01886	4.10403	7.87e-05	0
C19orf68	-0.359578	4.10237	7.9e-05	0
SERPINB1	-0.643428	4.10237	7.9e-05	0
MYO1H	0.252457	4.10182	7.91e-05	0
PRDM6	-0.587123	4.10073	7.93e-05	0
NDUFB11	0.546165	4.10073	7.93e-05	0
IMPDH2	0.474029	4.09909	7.96e-05	0
COL13A1	-0.319348	4.09909	7.96e-05	0
GRIK5	-0.321557	4.09691	8e-05	0
MAPK11	-0.245229	4.0942	8.05e-05	0
WNT9A	-0.354856	4.09366	8.06e-05	0
LOC644794	0.836826	4.09366	8.06e-05	0
ROBO1	-0.748545	4.09366	8.06e-05	0
ZNF536	-0.299147	4.09313	8.07e-05	0
SIX2	-0.397808	4.08831	8.16e-05	0
ATG2B	0.293585	4.08672	8.19e-05	0
SULT1A1	-0.306414	4.08355	8.25e-05	0
BSDC1	0.319598	4.08249	8.27e-05	0
ARID1B	-0.295835	4.08249	8.27e-05	0
COL25A1	-0.253411	4.07935	8.33e-05	0
C12orf68	-0.231014	4.07831	8.35e-05	0
ATP11B	0.454134	4.07727	8.37e-05	0
LOC100128510	-0.464177	4.06905	8.53e-05	0
RHOJ	-0.521824	4.06854	8.54e-05	0
OSR2	-0.644478	4.06601	8.59e-05	0
SLC9A5	-0.324319	4.06601	8.59e-05	0
FXYD6	-0.908007	4.06399	8.63e-05	0
AKAP12	-0.333746	4.06148	8.68e-05	0
REV3L	-0.345202	4.05799	8.75e-05	0
CLDN5	-0.433643	4.05799	8.75e-05	0
PIGP	0.607561	4.05651	8.78e-05	0
TP63	-0.519155	4.05552	8.8e-05	0
LOC200830	-0.354243	4.05453	8.82e-05	0
ARL4D	-0.274396	4.05257	8.86e-05	0
CYB5R3	-0.464023	4.05208	8.87e-05	0
TNS1	-0.670523	4.04383	9.04e-05	0
CDC42EP4	-0.382403	4.04239	9.07e-05	0
PM20D2	0.500387	4.03386	9.25e-05	0
AGAP1	0.547847	4.03198	9.29e-05	0
KIAA1826	-0.374064	4.03198	9.29e-05	0
BRPF1	-0.379887	4.03105	9.31e-05	0
NPFF	-0.359326	4.03058	9.32e-05	0
CDKN1C	-0.280687	4.02965	9.34e-05	0
C1orf186	-0.599013	4.02826	9.37e-05	0
SYTL4	-0.241527	4.02826	9.37e-05	0
PRDM11	-0.251	4.02687	9.4e-05	0
DOK6	-0.235309	4.02319	9.48e-05	0
EPHX3	-0.413193	4.02182	9.51e-05	0
GPSM2	-0.295064	4.02182	9.51e-05	0
LOC100286999	-0.310636	4.02091	9.53e-05	0
ARHGAP32	0.595079	4.02091	9.53e-05	0
EDDM3A	-0.608911	4.02091	9.53e-05	0
GAB2	-0.43031	4.02045	9.54e-05	0
LHB	-0.398687	4.02	9.55e-05	0
TFAP2C	0.592611	4.01954	9.56e-05	0
PAQR7	-0.390022	4.01954	9.56e-05	0
LOC728613	0.532968	4.01909	9.57e-05	0
OSTC	0.699524	4.01682	9.62e-05	0
ST5	-0.595601	4.01637	9.63e-05	0
NAT6	-0.384045	4.01502	9.66e-05	0
PGCP	-0.271883	4.01502	9.66e-05	0
PCDH12	-0.331153	4.00656	9.85e-05	0
VHL	0.354438	4.00656	9.85e-05	0
SLC12A4	-0.290213	4.00349	9.92e-05	0
LHFPL4	-0.280674	4.00087	9.98e-05	0
C1orf175	-0.814621	4.00043	9.99e-05	0
SETD6	0.38097	4.00043	9.99e-05	0
ATG16L2	-0.379304	3.99954	0.000100105	0
DKK1	-0.961005	3.99565	0.000101007	0
EXOC6	0.244306	3.99565	0.000101007	0
PIGN	0.643347	3.99404	0.000101382	0
FAM65A	-0.46844	3.99404	0.000101382	0
ECSCR	-0.448084	3.98864	0.000102651	0
TRIM16	-0.466084	3.98854	0.000102674	0
MOB2	-0.388326	3.98359	0.000103852	0
ADCY9	-0.270747	3.98316	0.000103954	0
DHX32	0.492433	3.98308	0.000103972	0
ZNF483	-0.577908	3.98261	0.000104086	0
PPARGC1B	-0.241636	3.98261	0.000104086	0
LGALS1	-0.655204	3.98094	0.000104486	0
NRG2	-0.514126	3.97769	0.000105272	0
NECAP1	0.409907	3.97698	0.000105444	0
PIP5K1C	-0.392738	3.97655	0.000105547	0
AFAP1L2	-0.51976	3.97655	0.000105547	0
STX2	-0.267851	3.97384	0.000106209	0
YAP1	-0.625755	3.97263	0.000106505	0
PCDH9	-0.474352	3.97028	0.000107082	0
KLHDC1	-0.23782	3.96788	0.000107677	0
LOC346887	-0.42657	3.96671	0.000107966	0
ITGB8	-0.612241	3.96619	0.000108095	0
ASB1	-0.291322	3.96374	0.000108707	0
MICALL1	-0.695374	3.96093	0.000109413	0
GLOD4	0.669777	3.95837	0.00011006	0
MMP25	-0.349682	3.95744	0.000110296	0
MYOT	-0.684188	3.95731	0.00011033	0
CILP	-0.522645	3.95075	0.000112008	0
STAC3	-0.453259	3.95019	0.000112153	0
MXRA7	-0.552333	3.94871	0.000112535	0
FAM22B	-0.352269	3.94842	0.00011261	0
CD36	-0.257994	3.94842	0.00011261	0
CD82	-0.371155	3.94842	0.00011261	0
C12orf24	-0.358801	3.94702	0.000112975	0
C19orf59	-0.409733	3.94702	0.000112975	0
CXorf36	-0.347243	3.94633	0.000113153	0
NOXA1	-0.301663	3.94462	0.0001136	0
C5orf41	-0.270029	3.94389	0.000113791	0
EMX2	-0.738669	3.93974	0.000114885	0
PRDX5	-0.354254	3.93584	0.000115921	0
NDP	-0.536357	3.93584	0.000115921	0
IFNGR2	0.63826	3.93584	0.000115921	0
FAM71E1	0.468676	3.93564	0.000115973	0
STYXL1	0.493253	3.93564	0.000115973	0
FXYD1	-0.644154	3.93468	0.00011623	0
LOC340085	-0.275204	3.93447	0.000116287	0
SFXN2	0.400563	3.93447	0.000116287	0
EEF1E1	0.44415	3.93447	0.000116287	0
DUOX1	-0.329453	3.93274	0.00011675	0
SLC4A4	1.54733	3.93265	0.000116776	0
USF2	-0.238435	3.93225	0.000116883	0
AK1	-0.302729	3.93225	0.000116883	0
HSD11B1	-0.596827	3.92952	0.000117619	0
AP1M2	0.562124	3.92799	0.000118034	0
CGN	0.527091	3.92507	0.000118832	0
SESN2	-0.28262	3.92473	0.000118924	0
NINJ1	-0.470818	3.92427	0.00011905	0
COL14A1	-0.771999	3.92418	0.000119074	0
ABCC3	-0.351751	3.92323	0.000119335	0
PAX8	-0.560523	3.92323	0.000119335	0
TRIOBP	-0.279899	3.91874	0.000120576	0
EGFL7	-0.410795	3.91729	0.000120978	0
CMA1	-0.339953	3.91551	0.000121476	0
CORO1B	0.352192	3.91019	0.000122973	0
KCNS2	-0.262743	3.90962	0.000123134	0
CXorf26	0.36322	3.90814	0.000123555	0
PLDN	0.544146	3.90472	0.000124532	0
FBXL14	0.232424	3.9036	0.000124854	0
ANXA6	-0.403885	3.9036	0.000124854	0
FAM189A2	0.867544	3.9035	0.000124881	0
TIE1	-0.358081	3.90331	0.000124938	0
PTPRU	-0.635664	3.90312	0.000124991	0
LOC100288387	-0.771212	3.90273	0.000125105	0
MFSD7	-0.325186	3.89896	0.000126193	0
ORC4L	0.360513	3.89871	0.000126268	0
HNRNPA1L2	-0.298548	3.89487	0.000127387	0
COLQ	-0.407306	3.894	0.000127645	0
PPP2R5B	-0.288146	3.8937	0.000127731	0
SHANK2	0.204341	3.89301	0.000127936	0
SYNJ2	0.388329	3.89301	0.000127936	0
RP9P	-0.29423	3.89065	0.000128632	0
RNASEH2B	-0.209534	3.88857	0.000129249	0
KREMEN2	-0.397836	3.88857	0.000129249	0
TMCO1	0.515264	3.8884	0.000129299	0
GALNT3	0.644645	3.88774	0.000129497	0
TUBG2	-0.498261	3.88406	0.000130598	0
OGG1	-0.205095	3.88098	0.000131529	0
PPAP2A	1.42063	3.87844	0.0001323	0
PAPPA	-0.192844	3.87738	0.000132624	0
POLR2F	-0.216237	3.87611	0.000133011	0
SLC16A4	-0.317319	3.87611	0.000133011	0
RAB3IP	0.343307	3.87593	0.000133066	0
TIAF1	-0.605544	3.87338	0.000133849	0
PRKRIR	0.419375	3.869	0.000135206	0
SPATA2	0.36823	3.867	0.000135831	0
LHPP	-0.406316	3.86168	0.000137504	0
LAMP2	0.601825	3.8587	0.000138453	0
AHNAK2	-0.646952	3.8587	0.000138453	0
PARP10	-0.339348	3.85525	0.000139558	0
ZEB2	-0.292895	3.85388	0.000139996	0
DUSP16	0.353871	3.85346	0.000140133	0
NXPH3	-0.472726	3.85308	0.000140256	0
EMX2OS	-0.59188	3.85308	0.000140256	0
CFHR2	-0.505687	3.85221	0.000140537	0
KIAA0894	-0.474472	3.85097	0.00014094	0
WNT5A	-0.381029	3.8505	0.000141092	0
RASGRP2	-0.338842	3.85017	0.000141197	0
SH3PXD2B	-0.39786	3.85016	0.000141203	0
FLJ21369	0.451668	3.85016	0.000141203	0
KIR3DX1	-0.337823	3.8495	0.000141416	0
LOC100287482	0.259338	3.84774	0.00014199	0
ZNF652	0.609442	3.84749	0.000142074	0
CLEC4G	0.411291	3.84296	0.000143563	0
C11orf16	-0.325064	3.8425	0.000143713	0
RSC1A1	0.585885	3.83625	0.000145798	0
GBP2	-0.784675	3.83615	0.00014583	0
HSH2D	0.50532	3.83414	0.000146509	0
ST8SIA1	-0.25996	3.83414	0.000146509	0
NUS1	0.540093	3.83006	0.000147892	0
CHN1	-0.599273	3.82353	0.00015013	0
UBXN4	0.490498	3.82353	0.00015013	0
SPTBN4	-0.297376	3.82301	0.000150311	0
SCCPDH	0.491393	3.81827	0.000151959	0
LOC145837	1.72814	3.8172	0.000152334	0
LSM12	0.456569	3.81495	0.000153128	0
HIST1H2BK	1.44142	3.81495	0.000153128	0
PDXDC1	0.339536	3.81147	0.000154358	0
BHLHE22	-0.265603	3.81078	0.000154603	0
DDRGK1	-0.287059	3.81031	0.000154771	0
ZCCHC9	0.554657	3.80964	0.00015501	0
SYT8	-0.385304	3.80733	0.000155837	0
PTGER3	-0.189699	3.80379	0.000157111	0
C6orf182	-0.19403	3.80349	0.00015722	0
CYB5A	0.589602	3.80076	0.000158211	0
UBE2J1	0.618914	3.79999	0.000158493	0
EFS	-0.723578	3.79516	0.000160266	0
SAP30BP	-0.27467	3.79467	0.000160446	0
ACSL3	1.18304	3.79467	0.000160446	0
LOC100130654	-0.429908	3.793	0.000161063	0
LOC100293679	-0.4514	3.79046	0.000162008	0
ZNF793	-0.365975	3.7895	0.000162368	0
ZNF664	0.292474	3.78836	0.000162793	0
C21orf67	0.395175	3.78836	0.000162793	0
PHACTR4	0.406727	3.78637	0.000163541	0
ABO	-0.545409	3.78637	0.000163541	0
CUTA	0.419441	3.78559	0.000163837	0
MIOS	0.537498	3.784	0.000164439	0
DDR2	-0.51839	3.784	0.000164439	0
DUS2L	-0.281533	3.78346	0.000164642	0
OBSCN	-0.318853	3.78342	0.000164658	0
NXPH4	0.725513	3.77828	0.000166616	0
JOSD2	-0.345617	3.77559	0.000167652	0
RHCG	-0.426232	3.77552	0.000167681	0
NDN	-0.386548	3.77156	0.000169216	0
PREP	0.37881	3.77009	0.00016979	0
BDH2	-0.353886	3.77009	0.00016979	0
MST4	-0.696235	3.77009	0.00016979	0
SLC15A3	-0.43648	3.76347	0.000172398	0
KDM1B	0.335551	3.76347	0.000172398	0
DBI	1.08679	3.76257	0.000172753	0
ZNF187	-0.42835	3.76119	0.000173304	0
EXTL1	-0.33908	3.76086	0.000173437	0
C17orf61	0.577773	3.75737	0.000174835	0
C3orf19	-0.300342	3.75687	0.000175036	0
PDIA6	0.75767	3.75667	0.000175117	0
CANX	0.645485	3.75581	0.000175463	0
PTGES	-0.517569	3.75548	0.000175598	0
EIF2S2	0.351828	3.754	0.000176199	0
TARS	0.37141	3.754	0.000176199	0
TCEB3C	0.5143	3.754	0.000176199	0
TMEM214	0.448321	3.75184	0.000177076	0
ZNF277	0.297392	3.74975	0.000177931	0
PLEKHH1	1.6597	3.74798	0.000178655	0
ZNF816A	0.429134	3.74658	0.000179235	0
HDLBP	0.348632	3.74643	0.000179294	0
RBMS3	-0.38869	3.74187	0.00018119	0
LOC92659	-0.347714	3.74187	0.00018119	0
RUSC2	-0.393115	3.74115	0.00018149	0
BNIP2	-0.555579	3.74047	0.000181775	0
ESAM	-0.463576	3.74019	0.000181889	0
EVC	-0.342813	3.73856	0.000182576	0
PLCL2	-0.263788	3.73814	0.000182749	0
CD81	-0.517179	3.73795	0.000182833	0
TCF4	-0.508916	3.73774	0.000182919	0
PPP1R12C	-0.267269	3.73719	0.00018315	0
CAMKK2	0.945274	3.73719	0.00018315	0
ZCCHC6	0.786738	3.73689	0.000183279	0
STAMBP	0.329735	3.73664	0.000183382	0
ACAP3	-0.444074	3.73593	0.000183683	0
SSR1	0.742018	3.73563	0.00018381	0
GLIS3	-0.467398	3.73434	0.000184357	0
PXK	-0.339326	3.73434	0.000184357	0
ZNF768	-0.293376	3.73399	0.000184504	0
ABCF1	0.427084	3.73399	0.000184504	0
KIAA0427	-0.347086	3.7336	0.000184671	0
MR1	-0.342841	3.7321	0.00018531	0
MUM1	-0.303634	3.73145	0.000185589	0
CPNE4	1.42065	3.73145	0.000185589	0
C14orf1	0.315828	3.73145	0.00018559	0
HHIPL2	-0.314718	3.73024	0.000186106	0
SAFB	-0.232923	3.73024	0.000186106	0
PQBP1	-0.178086	3.72819	0.000186986	0
TMEM74	0.201103	3.72656	0.000187688	0
AZGP1	1.33345	3.72321	0.000189143	0
APOO	0.60443	3.72198	0.000189679	0
RGS9	-0.428891	3.72023	0.000190446	0
DST	-0.49	3.71794	0.000191452	0
GALNT1	0.453547	3.71693	0.000191897	0
KCNQ4	-0.309316	3.71628	0.000192184	0
ZFP14	-0.339813	3.71553	0.000192516	0
IRF5	-0.329463	3.71519	0.00019267	0
LOC200772	-0.316698	3.71347	0.000193433	0
MEF2C	-0.574383	3.71259	0.000193824	0
FLNA	-0.738374	3.71259	0.000193824	0
MAL2	0.950793	3.71259	0.000193824	0
GNB1	0.422407	3.71238	0.000193919	0
UNC119	-0.279384	3.71148	0.000194322	0
GPR144	-0.290568	3.71105	0.000194514	0
SIPA1L3	0.315112	3.7103	0.00019485	0
FLJ44896	-0.277424	3.70773	0.000196005	0
ARHGAP10	-0.507763	3.70743	0.000196142	0
WNT10A	-0.478342	3.70743	0.000196142	0
LOC100289641	-0.260602	3.70743	0.000196142	0
RUNX1T1	-0.27885	3.70676	0.000196443	0
CPO	-0.365383	3.70673	0.000196457	0
NCOR1	0.275184	3.7066	0.000196517	0
MLLT4	0.335812	3.70484	0.000197313	0
CNTROB	-0.251489	3.70397	0.000197711	0
B3GALT4	-0.308776	3.70237	0.000198441	0
UCHL1	-0.351149	3.70114	0.000199002	0
CD2BP2	-0.255085	3.70114	0.000199002	0
PLCH2	-0.323153	3.70114	0.000199002	0
PCOLCE2	-0.700721	3.70043	0.000199331	0
CHRNB2	-0.228012	3.70043	0.000199331	0
C4orf42	0.212557	3.69914	0.000199922	0
SHF	-0.338698	3.69077	0.00020381	0
LOC283508	-0.33242	3.68974	0.000204294	0
SRCRB4D	-0.343419	3.6874	0.000205398	0
RPLP2	0.270208	3.68546	0.000206318	0
MAPRE3	-0.290158	3.68546	0.000206318	0
STAT5B	-0.344808	3.68531	0.000206389	0
LPIN3	-0.356667	3.68531	0.000206389	0
ZNF29P	-0.210216	3.68531	0.000206389	0
ACCN4	-0.312582	3.68315	0.000207419	0
MARVELD1	-0.337836	3.68315	0.000207419	0
C3orf62	0.300079	3.68252	0.000207722	0
MTHFS	0.37076	3.68252	0.000207722	0
RAB40A	-0.41895	3.68252	0.000207722	0
ALMS1	-0.207043	3.68225	0.000207852	0
TNFSF18	-0.289485	3.68221	0.000207869	0
ZNF204P	-0.280901	3.68188	0.000208027	0
RRAD	-0.539426	3.68134	0.000208287	0
RPL23AP32	-0.696979	3.68134	0.000208287	0
FAM155A	-0.396553	3.68113	0.000208387	0
LARS2	0.467032	3.68029	0.000208788	0
SENP1	-0.293787	3.67883	0.000209494	0
FLJ11292	-0.196031	3.67856	0.000209625	0
SCAND2	-0.214136	3.67812	0.000209834	0
TNFSF10	0.791896	3.67794	0.000209921	0
TSPAN13	1.54954	3.67785	0.000209965	0
CCDC8	-0.33725	3.67491	0.000211391	0
C6orf195	-0.271008	3.67411	0.000211783	0
LGI3	-0.311153	3.67256	0.000212541	0
HIRIP3	-0.273907	3.66718	0.000215191	0
PSMD14	0.590115	3.66642	0.000215564	0
NEU3	0.278373	3.66325	0.000217146	0
UBTF	-0.242184	3.66304	0.000217248	0
LOC100216546	-0.380031	3.66275	0.000217393	0
LHFPL2	-0.424943	3.66275	0.000217393	0
TBC1D14	0.368691	3.66261	0.000217467	0
NCOA4	0.945777	3.66015	0.000218703	0
PBXIP1	-0.275009	3.66007	0.000218741	0
VPS54	0.442123	3.65953	0.000219015	0
CNOT6L	0.263138	3.65631	0.000220644	0
CTU2	-0.328015	3.65512	0.000221246	0
C7orf51	-0.300472	3.6546	0.000221511	0
RPS18	0.574229	3.65445	0.000221591	0
CLRN3	0.356238	3.65394	0.000221851	0
FARP1	0.368654	3.65311	0.000222277	0
ALS2CR11	-0.172389	3.65086	0.000223428	0
PEG3	-0.340619	3.65086	0.000223428	0
GPR153	-0.221063	3.6504	0.000223668	0
ZNF575	-0.429861	3.65006	0.000223843	0
TP53TG1	0.312882	3.64932	0.000224222	0
GNG4	1.25682	3.6479	0.000224957	0
IL17D	-0.375919	3.64488	0.000226528	0
ZNF584	-0.360375	3.64297	0.000227523	0
TRIM68	0.59956	3.64291	0.000227557	0
UNC119B	-0.291784	3.64236	0.000227845	0
DPY19L3	0.722284	3.6418	0.000228141	0
PI16	-0.351375	3.64151	0.00022829	0
ALG6	0.361209	3.64103	0.000228543	0
BCORL2	0.258577	3.64103	0.000228543	0
FAM176A	-0.270778	3.64101	0.000228552	0
CCDC135	0.443597	3.63836	0.000229954	0
MPDU1	0.320933	3.63645	0.000230966	0
TENC1	-0.496226	3.63606	0.000231174	0
C10orf118	0.405835	3.63561	0.000231415	0
MRPS24	0.520015	3.6356	0.000231422	0
CAPNS2	-0.408322	3.6356	0.000231422	0
XKR4	-0.261034	3.63456	0.000231972	0
HEBP2	0.985978	3.63321	0.000232696	0
SAMD11	-0.527026	3.63265	0.000232997	0
REPS2	0.883082	3.6315	0.000233617	0
MED9	-0.281373	3.6315	0.000233617	0
SAPS1	-0.265735	3.62743	0.000235814	0
MFAP2	-0.48412	3.62591	0.000236643	0
FHL1	-1.06018	3.62461	0.000237353	0
FAM134C	0.489061	3.62379	0.000237797	0
RPS12	0.244676	3.62379	0.000237797	0
SERINC5	1.62852	3.62379	0.000237797	0
NDUFA11	-0.301062	3.62379	0.000237797	0
LOC283392	-0.455696	3.62379	0.000237797	0
SLC8A1	-0.531663	3.62268	0.000238405	0
MGC10814	-0.4214	3.62029	0.000239724	0
BMP7	-0.364266	3.61934	0.000240248	0
GAL3ST4	-0.245577	3.61346	0.000243525	0
HTRA3	-0.207239	3.61346	0.000243525	0
TXNDC11	0.389418	3.61126	0.000244757	0
PSEN1	0.27597	3.6105	0.000245188	0
NOL3	0.418671	3.61018	0.000245369	0
FLRT2	-0.786694	3.60973	0.000245623	0
ZNF683	-0.33818	3.60926	0.000245892	0
COPB2	0.845146	3.60855	0.000246293	0
MAP1B	-0.981417	3.60829	0.000246441	0
LOC284276	-0.356956	3.60673	0.000247326	0
PSMA1	0.562537	3.6065	0.000247458	0
ELOVL7	0.891943	3.6065	0.000247458	0
DOC2A	-0.372668	3.60594	0.000247775	0
UBE2N	0.490019	3.60268	0.000249646	0
NRXN1	-0.223258	3.59999	0.000251192	0
PHF15	-0.358621	3.59745	0.000252669	0
LOC100288893	-0.369926	3.59719	0.000252819	0
CHRM2	-0.403059	3.59717	0.000252833	0
NPDC1	0.477402	3.59717	0.000252833	0
EEF2	0.575536	3.59705	0.000252898	0
SULT1A2	-0.291735	3.59704	0.000252907	0
PLEKHG3	-0.277679	3.59675	0.000253078	0
DCTN2	-0.178722	3.59675	0.000253078	0
RBM43	-0.295171	3.59672	0.000253092	0
RIN1	-0.326331	3.59672	0.000253092	0
KAZ	-0.271526	3.59672	0.000253092	0
LANCL1	0.524842	3.59133	0.000256254	0
ARHGEF1	-0.324957	3.59097	0.000256465	0
FAM63A	-0.30875	3.59076	0.000256591	0
RASL10A	0.426058	3.59076	0.000256591	0
PACSIN3	-0.329394	3.5883	0.000258047	0
TMLHE	-0.231328	3.58701	0.000258815	0
TMEM101	-0.397753	3.58619	0.000259302	0
REEP4	-0.385281	3.58078	0.000262556	0
RABEP2	0.432498	3.57814	0.000264158	0
ELF2	0.347917	3.57814	0.000264158	0
TDP2	0.874554	3.5768	0.000264974	0
TUBA4A	-0.368778	3.57601	0.000265452	0
CNNM3	0.387655	3.576	0.000265462	0
C2orf44	-0.43904	3.57593	0.000265506	0
LOC100129907	-0.308521	3.57507	0.000266029	0
CKAP5	0.289779	3.57477	0.000266213	0
CDADC1	-0.201038	3.57243	0.00026765	0
RAB17	0.561676	3.57207	0.000267871	0
SGPP2	-0.572549	3.57099	0.000268542	0
RPLP0	0.686533	3.57061	0.000268777	0
ZNHIT6	-0.272517	3.5696	0.0002694	0
TRMT61A	-0.227293	3.5696	0.0002694	0
CLDN11	-0.592321	3.5696	0.0002694	0
TBKBP1	-0.327347	3.5696	0.0002694	0
SYT17	0.354005	3.5696	0.0002694	0
PLS3	-0.644971	3.5696	0.0002694	0
ZNF257	-0.266502	3.5696	0.0002694	0
LOC728142	-0.265027	3.5649	0.000272332	0
NDRG3	1.01858	3.56478	0.00027241	0
RNF165	-0.236965	3.5644	0.000272649	0
PPP1R1A	-0.476036	3.5637	0.000273087	0
LRP1	-0.316119	3.56363	0.000273133	0
HGD	0.900835	3.56201	0.00027415	0
ALDH1A3	1.1668	3.56062	0.000275032	0
C1orf46	-0.266648	3.56008	0.000275369	0
COL18A1	-0.532672	3.55586	0.000278062	0
MIR770	-0.339267	3.55586	0.000278062	0
MBD5	-0.187839	3.55501	0.000278606	0
PTPLA	-0.277627	3.55202	0.000280528	0
GRHL3	-0.594224	3.55202	0.000280528	0
UBE2G1	0.584747	3.55202	0.000280528	0
MUC20	-0.611607	3.55202	0.000280528	0
FAHD2A	-0.406401	3.55202	0.000280528	0
LAMB3	-0.63455	3.55082	0.000281305	0
GPR114	-0.363556	3.5506	0.000281452	0
TMEM41B	0.535614	3.54621	0.000284309	0
SEMA3E	-0.32888	3.54621	0.000284309	0
CBX4	0.777292	3.54526	0.000284933	0
SLC25A1	0.517144	3.54391	0.000285816	0
PCCA	0.317843	3.54391	0.000285816	0
ZNF791	-0.484182	3.54391	0.000285816	0
FAM57B	-0.344492	3.54278	0.000286564	0
TULP3	-0.304203	3.54278	0.000286564	0
SS18L1	0.400792	3.54278	0.000286564	0
USP25	-0.177672	3.54278	0.000286564	0
CLCA2	-0.338593	3.54278	0.000286564	0
CAV1	-0.90522	3.54278	0.000286564	0
ALDH6A1	0.64612	3.5421	0.000287011	0
HIRA	0.207932	3.53956	0.000288698	0
DOK1	-0.277135	3.53838	0.00028948	0
ORMDL2	0.606417	3.53838	0.00028948	0
SEZ6L2	0.426855	3.53748	0.00029008	0
DLG4	-0.230487	3.53632	0.000290857	0
GPI	0.44599	3.53632	0.000290857	0
SHROOM2	0.778369	3.53213	0.000293678	0
DVL2	-0.218967	3.53171	0.000293964	0
PENK	-0.615502	3.52888	0.000295886	0
KIAA1797	0.401118	3.52814	0.000296387	0
TMEM131	0.455119	3.52691	0.000297231	0
CCDC101	-0.275131	3.52673	0.000297348	0
TMPRSS5	-0.36931	3.52653	0.000297488	0
SOX4	0.326939	3.52653	0.000297488	0
DSC3	-0.706203	3.52585	0.000297952	0
MAGI3	0.447745	3.52583	0.000297971	0
JSRP1	-0.340177	3.52472	0.000298728	0
MADD	-0.284543	3.52446	0.000298913	0
UNC13B	0.737719	3.52442	0.000298937	0
LRG1	-0.384121	3.52302	0.000299905	0
CDC25B	-0.564073	3.52265	0.000300155	0
S100A6	-0.594725	3.52221	0.000300463	0
MAP7D3	-0.264999	3.52155	0.000300919	0
FAM128A	0.547165	3.52109	0.000301239	0
KBTBD12	-0.321867	3.52088	0.000301386	0
SFRS17A	0.411839	3.52031	0.00030178	0
TMEM87A	0.51561	3.52009	0.000301931	0
ADD2	-0.218449	3.519	0.000302691	0
PRSS50	-0.365079	3.51786	0.000303486	0
GABRE	-0.996977	3.51786	0.000303486	0
LOC441167	0.320287	3.51721	0.000303944	0
RABGAP1L	-0.211028	3.5159	0.00030486	0
AKR1C2	-0.367209	3.51428	0.000306001	0
RAP1A	0.304342	3.51385	0.000306299	0
LCE1E	0.387203	3.51385	0.000306299	0
DMXL1	1.05362	3.51367	0.000306431	0
DIXDC1	-0.302502	3.51332	0.000306676	0
S100A3	-0.473682	3.51313	0.000306812	0
SLMO2	0.660304	3.51308	0.000306845	0
BMP5	-0.69475	3.51293	0.000306955	0
C19orf46	0.896903	3.51214	0.00030751	0
CHST3	-0.607649	3.51185	0.000307717	0
ZNF385A	-0.481934	3.51185	0.000307717	0
TCIRG1	-0.538596	3.51074	0.000308503	0
C1orf115	0.653376	3.51025	0.000308851	0
SIGLECP3	-0.389423	3.50745	0.000310846	0
KRBA1	-0.386809	3.50628	0.000311689	0
TMEM135	0.495997	3.5059	0.000311962	0
MTMR8	-0.235354	3.50483	0.00031273	0
CDK7	0.505776	3.50468	0.000312837	0
FER	-0.240675	3.50296	0.000314078	0
LOC100287322	-0.355028	3.50134	0.00031525	0
CXorf1	0.296424	3.50076	0.000315672	0
SLC43A2	-0.252124	3.50043	0.000315915	0
SSR3	0.724802	3.50002	0.000316216	0
RPS8	0.571286	3.49865	0.000317214	0
CRTAP	-0.397068	3.49865	0.000317214	0
PROCR	-0.239188	3.49851	0.000317311	0
C21orf45	0.20011	3.49783	0.000317814	0
RFFL	0.231246	3.4952	0.000319744	0
SCNN1B	-0.341896	3.49389	0.00032071	0
ZNF844	0.324144	3.49268	0.000321605	0
LOC375190	-0.57539	3.49257	0.000321687	0
MALT1	0.942986	3.49257	0.000321687	0
TACSTD2	0.514824	3.49257	0.000321687	0
LOC153910	0.244943	3.49225	0.000321918	0
PHLDB1	-0.276078	3.49062	0.00032313	0
PMM2	0.318839	3.48792	0.000325146	0
PLEKHG4	-0.339879	3.4874	0.000325537	0
UBE2J2	-0.266591	3.48691	0.000325901	0
RCAN2	-0.855515	3.48575	0.000326773	0
EDEM3	0.75781	3.48426	0.000327896	0
SOCS2	0.842381	3.48366	0.00032835	0
VWF	-0.527822	3.48366	0.00032835	0
KCTD2	-0.235129	3.4808	0.000330524	0
CES8	-0.378174	3.48055	0.000330713	0
KDR	-0.467888	3.47691	0.000333499	0
MVD	-0.324333	3.47691	0.000333499	0
COL7A1	-0.476899	3.47597	0.000334215	0
SNAP23	0.442433	3.4736	0.000336045	0
HINT3	0.327692	3.47288	0.000336604	0
IL34	-0.338355	3.47109	0.000337995	0
ACAD8	0.954037	3.46943	0.000339288	0
TBC1D8	0.483339	3.46496	0.000342802	0
MEIS2	-0.706493	3.46308	0.00034429	0
TTTY14	-0.302559	3.46079	0.000346106	0
TMEM127	-0.260365	3.46079	0.000346106	0
ISYNA1	-0.286795	3.46056	0.000346288	0
CTSL2	-0.304813	3.45928	0.000347311	0
ISL2	-0.461639	3.45873	0.00034775	0
LOC285463	0.839486	3.45687	0.000349241	0
NCRNA00158	0.290369	3.45687	0.000349241	0
ITGA3	-0.361993	3.4542	0.0003514	0
C1orf131	0.401478	3.4542	0.0003514	0
HSD17B8	-0.384682	3.45107	0.000353937	0
PRDX1	0.393499	3.45076	0.00035419	0
ERVWE1	0.304637	3.45045	0.000354449	0
RPL11	0.508732	3.44958	0.000355153	0
PIP5KL1	-0.270925	3.44886	0.000355748	0
GNL3	0.81238	3.44809	0.000356375	0
ABCF2	-0.246672	3.44809	0.000356375	0
TFDP1	0.204599	3.44803	0.000356425	0
ATAD3A	-0.364404	3.44716	0.000357143	0
FBXO38	0.310107	3.447	0.000357274	0
ATP5G2	0.305828	3.44641	0.000357762	0
SDPR	-0.456833	3.44434	0.000359465	0
RBMS2	-0.350453	3.44434	0.000359465	0
GNPNAT1	0.617933	3.44434	0.000359465	0
TARS2	-0.299158	3.44052	0.000362646	0
LOC100130872	0.656224	3.44052	0.000362646	0
RLIM	0.401187	3.4402	0.00036291	0
NIN	0.171205	3.43961	0.000363403	0
BAI3	-0.180439	3.43612	0.000366336	0
PPP3R1	0.594455	3.43612	0.000366336	0
RCAN3	1.27661	3.43612	0.000366336	0
LOC146880	-0.287644	3.43612	0.000366336	0
HOXB9	-0.313943	3.4357	0.000366693	0
AFF3	1.18264	3.43487	0.000367395	0
ARG2	1.78161	3.43398	0.000368142	0
TMEM27	0.243145	3.43398	0.000368142	0
GYPC	-0.458036	3.43192	0.000369895	0
NRIP1	0.570569	3.43192	0.000369895	0
PTPRA	-0.158142	3.43192	0.000369895	0
MAPKAPK5	0.338237	3.43192	0.000369895	0
PKP3	0.316876	3.43107	0.000370618	0
COL5A1	-0.686689	3.43094	0.00037073	0
CABP1	-0.255413	3.43038	0.000371208	0
FXYD2	-0.289377	3.42979	0.000371719	0
CHRNB1	-0.320842	3.42828	0.000373009	0
SLC27A3	-0.538501	3.42759	0.000373599	0
A4GALT	-0.244588	3.42604	0.00037494	0
CRIP3	-0.315911	3.42587	0.000375089	0
KDELR3	0.41274	3.42587	0.000375089	0
BTC	-0.177908	3.42514	0.000375719	0
LOC100133321	-0.318608	3.42456	0.000376218	0
ENTPD1	-0.302187	3.42341	0.000377212	0
ARSD	0.501933	3.42269	0.000377845	0
HSPB1	-0.57714	3.42064	0.000379628	0
MUTED	-0.312216	3.42052	0.000379738	0
COG4	-0.303078	3.42036	0.000379874	0
CSNK1A1	0.763175	3.41942	0.000380701	0
CPT2	0.337401	3.41942	0.000380701	0
DPY19L1P1	-0.186709	3.41586	0.000383834	0
HFE2	-0.332265	3.41586	0.000383834	0
TCAM1P	-0.327919	3.41586	0.000383834	0
LOC644538	-0.505916	3.41524	0.000384379	0
ZNF350	0.740837	3.41378	0.000385676	0
PRKCB	-0.296806	3.41378	0.000385676	0
KDM4B	0.3276	3.41278	0.000386565	0
CLEC11A	-0.382775	3.41205	0.000387217	0
HDAC11	-0.249173	3.41122	0.000387953	0
CENPB	-0.399178	3.40756	0.000391235	0
ADCY4	-0.308764	3.40741	0.000391374	0
KIAA1586	-0.274458	3.40623	0.000392433	0
TRIP10	-0.45068	3.40607	0.00039258	0
RPS7	0.530339	3.40607	0.00039258	0
PAQR8	-0.340013	3.40439	0.000394101	0
TLE2	-0.468825	3.40272	0.000395622	0
PAK4	0.330076	3.40189	0.000396377	0
TEX10	-0.356814	3.40104	0.000397158	0
EPN1	-0.288513	3.39778	0.00040015	0
C14orf132	-0.414944	3.3975	0.000400402	0
GRRP1	-0.317363	3.39699	0.000400878	0
TMEM176A	-0.579095	3.39699	0.000400878	0
MOBKL2C	-0.311398	3.39699	0.000400878	0
HSPA12B	-0.295524	3.39526	0.000402479	0
RALGAPB	0.371587	3.39479	0.000402914	0
IGFALS	-0.305425	3.39172	0.000405773	0
C9orf25	-0.428598	3.39107	0.000406381	0
GPR126	-0.180422	3.39107	0.000406381	0
DRAM2	0.434504	3.39098	0.000406458	0
SCPEP1	-0.368686	3.38914	0.000408187	0
XPNPEP2	-0.279853	3.38914	0.000408187	0
TRPM8	1.46211	3.38896	0.000408355	0
LOC283567	0.297808	3.38851	0.00040878	0
NOP10	0.637079	3.38652	0.000410657	0
PLEKHH2	-0.500287	3.38641	0.000410766	0
SNORA74A	0.760648	3.38641	0.000410766	0
LY6E	-0.560982	3.3853	0.000411815	0
LOC285045	0.265964	3.38408	0.000412975	0
PEX7	0.463555	3.38106	0.000415849	0
C16orf74	-0.406886	3.38106	0.000415849	0
MAZ	0.383561	3.381	0.000415906	0
LOC201477	-0.284172	3.37914	0.000417696	0
MCCC2	0.941452	3.37867	0.000418151	0
PURG	-0.227776	3.37867	0.000418151	0
PRKCA	-0.552281	3.37606	0.000420669	0
DNAJC3	0.619939	3.37484	0.000421853	0
CPAMD8	-0.65137	3.37482	0.00042187	0
RGS14	-0.244561	3.37482	0.00042187	0
ATP2C2	0.477179	3.37467	0.000422013	0
EIF4EBP1	0.665081	3.37409	0.000422584	0
KIAA1274	-0.347961	3.3704	0.000426187	0
ZNF552	0.198154	3.36974	0.000426837	0
RGAG4	-0.27374	3.36624	0.000430284	0
BIN1	-0.373442	3.3658	0.000430726	0
CELF6	-0.289365	3.36544	0.000431081	0
LOC646014	-0.401178	3.36544	0.000431081	0
EFHD1	-0.895826	3.36364	0.00043287	0
TRAF6	-0.242566	3.36306	0.000433452	0
DTX3	-0.278712	3.36306	0.000433452	0
TMEM126B	0.288678	3.36306	0.000433452	0
PML	-0.199411	3.36306	0.000433452	0
TMED2	0.742775	3.36306	0.000433452	0
PRKD3	-0.264744	3.36306	0.000433452	0
MXRA8	-0.67023	3.3629	0.000433606	0
PSIP1	-0.314361	3.36206	0.000434448	0
C2orf14	1.83407	3.36206	0.000434448	0
MAP4K3	0.788104	3.35831	0.000438216	0
KRTAP4-8	-0.231596	3.3575	0.000439039	0
DOC2B	-0.394716	3.35735	0.000439192	0
LOC158960	0.563327	3.35735	0.000439192	0
ST6GALNAC4	-0.308512	3.35489	0.000441687	0
MST1R	-0.264977	3.35489	0.000441687	0
ITGA2	-0.403843	3.35277	0.000443848	0
FGFR2	-0.359607	3.35277	0.000443848	0
NRIP2	-0.310655	3.35277	0.000443848	0
SUSD5	-0.198721	3.35247	0.000444149	0
TTLL11	-0.342429	3.35	0.000446687	0
RPS10P5	0.521443	3.34963	0.000447061	0
CCDC52	0.293722	3.34858	0.000448148	0
POLA2	-0.252471	3.34858	0.000448148	0
TMEM106A	-0.271654	3.34795	0.000448799	0
GALNS	-0.254856	3.34667	0.000450123	0
ABLIM3	-0.421395	3.34061	0.000456443	0
UNC13D	-0.291614	3.34027	0.000456803	0
LOC100133319	-0.33716	3.33977	0.000457335	0
TIMP2	-0.76428	3.33897	0.000458178	0
CBX7	-0.406207	3.33792	0.000459285	0
PRRX2	-0.413638	3.3373	0.000459944	0
DLX1	0.646528	3.3373	0.000459944	0
CSGALNACT1	0.829565	3.33591	0.000461413	0
CCL28	-0.254909	3.33591	0.000461413	0
C15orf44	0.277835	3.33559	0.000461757	0
MFN1	0.401546	3.33457	0.000462844	0
ADRA1D	-0.368662	3.3343	0.000463129	0
PCNXL3	0.391433	3.32923	0.000468562	0
GUSB	0.32806	3.32923	0.000468562	0
IFIT2	-0.373799	3.32705	0.000470921	0
MRPS23	0.516582	3.32501	0.000473135	0
PDGFB	-0.247868	3.32259	0.000475786	0
COPB1	0.42232	3.32225	0.000476159	0
MIF	0.60625	3.32158	0.00047689	0
OPTN	-0.440457	3.32012	0.000478493	0
FAT2	-0.390346	3.31969	0.000478971	0
FSHR	0.224575	3.31946	0.000479223	0
GLO1	1.26389	3.31941	0.000479281	0
FABP2	-0.231434	3.31941	0.000479281	0
C20orf27	-0.394639	3.31941	0.000479281	0
PSMD8	0.442636	3.31706	0.00048188	0
FAM109A	-0.281613	3.31626	0.00048277	0
BCAM	0.785294	3.31626	0.00048277	0
SEMA3B	-0.311035	3.3154	0.000483723	0
NEURL	-0.283759	3.31493	0.000484253	0
APOBEC2	-0.372404	3.31484	0.000484348	0
C10orf72	-0.294218	3.31484	0.000484348	0
LZTS2	-0.262299	3.31383	0.000485479	0
PVR	0.280016	3.31383	0.000485479	0
SLC6A17	-0.240507	3.31377	0.000485541	0
RALB	0.41031	3.31264	0.000486814	0
DUSP19	-0.162256	3.30859	0.000491369	0
LOC400604	-0.255325	3.30859	0.000491369	0
C1orf224	-0.427062	3.30763	0.000492457	0
OLFM4	-2.41094	3.30615	0.000494142	1
ORC5L	0.406083	3.3052	0.000495222	0
LOC283904	-0.829923	3.3052	0.000495222	0
EIF3I	0.524281	3.30325	0.000497451	0
BARHL1	-0.378963	3.30178	0.000499136	0
TP53RK	0.303077	3.30135	0.000499633	0
TUSC5	-0.372765	3.30083	0.000500236	0
PCCB	0.295422	3.2989	0.000502458	0
PHF12	0.623579	3.29867	0.00050272	0
PIGH	0.549134	3.29797	0.000503532	0
PDE4A	-0.239019	3.29797	0.000503532	0
POFUT1	-0.214509	3.29739	0.000504212	0
CCND2	-0.733745	3.29603	0.00050579	0
MTX2	0.702573	3.29603	0.00050579	0
ACBD4	-0.326243	3.29597	0.000505858	0
CA11	-0.496839	3.29572	0.00050615	0
NEU4	-0.348939	3.29572	0.00050615	0
MYL6B	-0.49097	3.29389	0.000508291	0
NLRP1	-0.47698	3.29387	0.000508306	0
CPNE6	-0.271423	3.29387	0.000508306	0
EIF5A2	-0.193988	3.29283	0.000509529	0
ANKDD1A	-0.24381	3.29262	0.000509775	0
AACSL	-0.292399	3.29262	0.000509775	0
SCAMP4	0.352657	3.28877	0.000514318	0
NLRC5	-0.7407	3.28661	0.000516886	0
ARHGEF15	-0.253972	3.28223	0.00052212	0
P4HA2	-0.220488	3.28125	0.000523297	0
GGT1	1.04411	3.28046	0.000524256	0
LOC728073	-0.362766	3.28046	0.000524256	0
CASQ2	-0.571179	3.28046	0.000524256	0
TPCN2	-0.206264	3.28042	0.000524298	0
RAD23B	0.402551	3.27678	0.000528712	0
GEFT	-0.474536	3.27522	0.000530611	0
B3GNT3	-0.281721	3.27458	0.000531403	0
CLN3	0.378218	3.27266	0.000533758	0
ATN1	-0.407581	3.27128	0.000535457	0
FRYL	0.281373	3.27128	0.000535457	0
CLIC5	-0.173849	3.27041	0.000536526	0
TMEM105	-0.330872	3.27018	0.000536806	0
LIX1L	-0.515547	3.27018	0.000536806	0
GOLGA4	0.407491	3.27018	0.000536806	0
SLC25A16	0.463221	3.26944	0.000537723	0
KLHDC4	-0.225383	3.26862	0.000538742	0
BICD2	-0.232623	3.26792	0.000539612	0
ZNF319	-0.301592	3.26552	0.000542597	0
DCTN4	0.387389	3.26429	0.000544139	0
DDAH1	0.520388	3.26384	0.000544702	0
LOC100287445	2.17003	3.26384	0.000544702	1
RAMP2	-0.46444	3.26251	0.000546368	0
BAHD1	-0.363351	3.26228	0.000546663	0
TNFRSF13B	-0.334019	3.26125	0.000547958	0
SDC1	-0.684051	3.2611	0.000548157	0
CIZ1	-0.189111	3.26079	0.000548548	0
ACOT11	-0.26527	3.26079	0.000548548	0
NPFFR1	-0.331463	3.26079	0.000548548	0
PRDM14	0.433669	3.26079	0.000548548	0
SRP19	0.820032	3.25896	0.000550855	0
NACA	0.605224	3.25886	0.000550986	0
PLSCR3	-0.363998	3.25813	0.000551915	0
PLP2	-0.745519	3.25813	0.000551915	0
LOC642852	-0.203087	3.25809	0.000551962	0
FOLH1	1.91436	3.25809	0.000551962	0
NDUFB5	0.581275	3.25626	0.000554296	0
FOLH1B	1.73006	3.25624	0.000554316	0
C1orf183	-0.243959	3.25479	0.00055617	0
C6orf115	0.592327	3.25468	0.000556308	0
C11orf68	-0.348221	3.25373	0.000557533	0
GSTM4	-0.739746	3.2528	0.000558732	0
EED	-0.289657	3.25131	0.000560653	0
CEND1	-0.273203	3.25131	0.000560653	0
REEP6	0.857955	3.25131	0.000560653	0
ZSCAN21	0.485043	3.25131	0.000560653	0
CAMP	-0.272528	3.25102	0.000561022	0
NUP62CL	-0.196439	3.24961	0.000562847	0
ACACA	0.708512	3.24936	0.000563175	0
LOC729164	-0.270481	3.24814	0.000564752	0
ALDH1L1	-0.272417	3.24814	0.000564752	0
MAEA	0.353058	3.24813	0.000564765	0
PAPLN	-0.386067	3.24578	0.000567828	0
NPLOC4	0.464239	3.24432	0.000569739	0
GSTK1	-0.29202	3.24357	0.000570724	0
ZNF789	0.367766	3.24339	0.000570968	0
SFTPA2	1.98948	3.24328	0.000571106	0
BZW1	0.900727	3.24328	0.000571106	0
NPEPL1	-0.220775	3.24235	0.000572333	0
PRDX3	0.755355	3.24235	0.000572333	0
SUZ12P	-0.430815	3.24235	0.000572333	0
C22orf34	-0.299656	3.24063	0.000574605	0
DNAJC17	-0.27308	3.24063	0.000574605	0
IGF2BP2	-0.337094	3.24063	0.000574605	0
TBXA2R	-0.214011	3.23918	0.000576528	0
ZNF85	0.258772	3.23916	0.000576549	0
ARHGAP39	0.510135	3.23897	0.000576803	0
GMPPB	0.545075	3.23835	0.000577625	0
RPS9	0.275165	3.23835	0.000577625	0
F10	-0.29568	3.23775	0.000578429	0
IGF2R	0.490897	3.23759	0.000578647	0
LOC729177	-0.297166	3.23692	0.000579539	0
SSR4	0.656105	3.23669	0.000579845	0
MPP5	0.369538	3.23669	0.000579845	0
SLC11A2	0.374645	3.23664	0.000579904	0
DUX1	-0.302418	3.23482	0.000582349	0
MMP28	-0.248773	3.23469	0.000582517	0
KCNMA1	-0.420979	3.23399	0.000583456	0
LOC643008	-0.313591	3.23281	0.000585045	0
SCG3	-0.2444	3.22834	0.000591102	0
ARHGEF7	0.295598	3.22834	0.000591102	0
PNPT1	0.360041	3.22725	0.000592584	0
PLEKHM1	-0.214173	3.22568	0.000594724	0
FSTL4	-0.157851	3.225	0.000595666	0
CSTA	-0.537906	3.22273	0.000598777	0
SMO	-0.288445	3.2221	0.000599648	0
SYP	-0.276559	3.2221	0.000599648	0
ENOX2	-0.156963	3.2212	0.000600892	0
C10orf4	-0.173624	3.21949	0.000603272	0
ITGA8	-0.842664	3.21949	0.000603272	0
PAPSS1	0.53592	3.21947	0.000603298	0
OR2W3	0.432146	3.21938	0.000603423	0
ANKH	0.505602	3.21831	0.000604906	0
EIF4G1	0.356769	3.21784	0.000605561	0
FCGBP	-0.717939	3.21762	0.000605875	0
ZNF740	-0.269192	3.21666	0.000607205	0
EMP3	-0.452968	3.21651	0.000607416	0
PECI	0.678134	3.216	0.000608141	0
SELM	-0.613404	3.21598	0.000608167	0
NEFL	-0.192349	3.21479	0.000609828	0
SHE	-0.328524	3.21374	0.000611305	0
ZNF555	-0.177144	3.21374	0.000611305	0
CAB39L	0.7503	3.21283	0.000612597	0
UQCRQ	0.539365	3.21283	0.000612597	0
PRG2	-0.321107	3.21283	0.000612597	0
TRPV3	-0.211093	3.21142	0.000614577	0
[truncated: 17,904 more rows]
